# Supplementary material for: A pushing chronic care forward in Abu Dhabi by identifying priorities and addressing barriers: a modified Delphi technique
Source: PubMed Central journal article supplement — BMJ Open. 2018 Jun 4;8(6):e020189. doi: 10.1136/bmjopen-2017-020189 (PMC5988158; doi:10.1136/bmjopen-2017-020189), 2018-06-04
Supplement: bmjopen-2017-020189.draft_revisions.pdf [file bmjopen-2017-020189.draft_revisions.pdf]

# BMJ Open

BMJ Open is committed to open peer review. As part of this commitment we make the peer review history of every article we publish publicly available.

When an article is published we post the peer reviewers' comments and the authors' responses online. We also post the versions of the paper that were used during peer review. These are the versions that the peer review comments apply to.

The versions of the paper that follow are the versions that were submitted during the peer review process. They are not the versions of record or the final published versions. They should not be cited or distributed as the published version of this manuscript.

BMJ Open is an open access journal and the full, final, typeset and author-corrected version of record of the manuscript is available on our site with no access controls, subscription charges or pay-per-view fees (<http://bmjopen.bmj.com>).

If you have any questions on BMJ Open's open peer review process please email [info.bmjopen@bmj.com](mailto:info.bmjopen@bmj.com)

# BMJ Open

## PUSHING CHRONIC CARE MODEL FORWARD IN ABU DHABI BY IDENTIFYING PRIORITIES AND BARRIERS: A MODIFIED DELPHI TECHNIQUE

|                                 |                                                                                                                                                                                                                                                                                                                                                                                                                                                |
|---------------------------------|------------------------------------------------------------------------------------------------------------------------------------------------------------------------------------------------------------------------------------------------------------------------------------------------------------------------------------------------------------------------------------------------------------------------------------------------|
| Journal:                        | <i>BMJ Open</i>                                                                                                                                                                                                                                                                                                                                                                                                                                |
| Manuscript ID                   | bmjopen-2017-020189                                                                                                                                                                                                                                                                                                                                                                                                                            |
| Article Type:                   | Research                                                                                                                                                                                                                                                                                                                                                                                                                                       |
| Date Submitted by the Author:   | 23-Oct-2017                                                                                                                                                                                                                                                                                                                                                                                                                                    |
| Complete List of Authors:       | Paulo, Marília; United Arab Emirates University College of Medicine and Health Sciences, Institute of Public Health; Universidade Nova de Lisboa Instituto de Higiene e Medicina Tropical, Loney, Tom; United Arab Emirates University College of Medicine and Health Sciences, Institute of Public Health Lapão, Luis ; Instituto de Higiene e Medicina Tropical - Universidade Nova de Lisboa, International Public Health and Biostatistics |
| <b>Primary Subject Heading</b>: | Health services research                                                                                                                                                                                                                                                                                                                                                                                                                       |
| Secondary Subject Heading:      | Health policy, Health services research                                                                                                                                                                                                                                                                                                                                                                                                        |
| Keywords:                       | Health policy < HEALTH SERVICES ADMINISTRATION & MANAGEMENT, Organisation of health services < HEALTH SERVICES ADMINISTRATION & MANAGEMENT, Organisational development < HEALTH SERVICES ADMINISTRATION & MANAGEMENT, International health services < HEALTH SERVICES ADMINISTRATION & MANAGEMENT                                                                                                                                              |
|                                 |                                                                                                                                                                                                                                                                                                                                                                                                                                                |

SCHOLARONE™  
Manuscripts

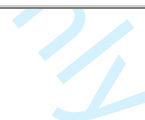

1  
2  
3  
4 **PUSHING CHRONIC CARE MODEL FORWARD IN ABU DHABI BY IDENTIFYING**  
5 **PRIORITIES AND BARRIERS: A MODIFIED DELPHI TECHNIQUE**

6 Marília Silva Paulo<sup>1,2\*</sup> (MSc), Tom Loney<sup>2,3</sup> (PhD) and Luís Velez Lapão<sup>1,4</sup> (PhD)  
7  
8  
9

10 <sup>1</sup>Global Health and Tropical Medicine, Instituto de Higiene e Medicina Tropical, Universidade  
11 Nova de Lisboa, Lisboa, Portugal  
12  
13

14 <sup>2</sup>Institute of Public Health, College of Medicine and Health Sciences, United Arab Emirates  
15 University, United Arab Emirates  
16  
17

18 <sup>3</sup>World Health Organisation Collaborating Center for Occupational Health, Al Ain, United Arab  
19 Emirates  
20  
21

22 <sup>4</sup>World Health Organisation Collaborating Center for Health Workforce Policy and Planning,  
23 Lisbon, Portugal  
24  
25  
26

27 **Word count:** 3445  
28

29 **\* Address for Correspondence:**  
30  
31

32 Marília Silva Paulo  
33  
34

35 Institute of Public Health, College of Medicine and Health Sciences, United Arab Emirates  
36 University, United Arab Emirates  
37  
38

39 Office. +971 03 767 74 99; Mobile. +971 050 241 86 46; E-mail: [mariliap@uaeu.ac.ae](mailto:mariliap@uaeu.ac.ae)  
40  
41  
42  
43  
44  
45  
46  
47  
48  
49  
50  
51  
52  
53  
54  
55  
56  
57  
58  
59  
60

## ABSTRACT

**Objectives** This study aimed to elucidate the top five key priorities and barriers for chronic care in the health system of Abu Dhabi, United Arab Emirates.

**Design** A modified Delphi study was performed to reach consensus on priority areas and barriers for the development of the Chronic Care Model in the health system of Abu Dhabi. Individual wireless audience response devices (keypads) linked to a computer were used to reduce from 28 priorities and 20 barriers to the top five on 3 rounds, in 3 consecutive days.

**Setting** Chronic care services for patients with diabetes, cardiovascular diseases, and cancer, in both private and publicly funded healthcare services in the emirate of Abu Dhabi.

**Participants** A purposive sample of twenty health systems' experts was chosen. They were healthcare workers from the public and private sector, working in the delivery of care for patients with diabetes, cardiovascular diseases, and cancer.

**Results** The 'overall organizational leadership in chronic illness care' was ranked as the most important priority to address (26.3%) and 'patient compliance' was ranked as the most important barrier (36.8%) for the development of the Chronic Care Model.

**Conclusions** This study has identified the current priorities and barriers to improving chronic care within Abu Dhabi's healthcare system. Our paper addresses the UAE's 2021 Agenda aims and findings can help inform strategic changes required to achieve this mission.

### Strengths and limitations of this study:

- The use of the modified Delphi technique to reach consensus on the health system in Abu Dhabi is a novelty, as far as we know.
- The use of the wireless computer-linked keypads ensured participant privacy and confidentiality during the consensus exercise.
- The purposive sample of twenty healthcare experts was chosen to try to represent the healthcare workers population providing daily care to chronic patients, majority of female nurses. Although, this sample is not representative and the results can not be generalized.

1  
2  
3  
4  
5  
6  
7  
8  
9  
10  
11  
12  
13  
14  
15  
16  
17  
18  
19  
20  
21  
22  
23  
24  
25  
26  
27  
28  
29  
30  
31  
32  
33  
34  
35  
36  
37  
38  
39  
40  
41  
42  
43  
44  
45  
46  
47  
48  
49  
50  
51  
52  
53  
54  
55  
56  
57  
58  
59  
60

- The United Arab Emirates has a very international population, as well as the healthcare workers, which turns the health system of Abu Dhabi unique and internationally well positioned.

For peer review only

## INTRODUCTION

The Chronic Care Model (CCM) is a comprehensive model which integrates six elements to facilitate the delivery of high-quality care. Each element has its own strategic and developmental concepts to enhance the health outcomes of populations with chronic illness. This model was designed to help primary health care (PHC) practices improve health outcomes by changing the routine of care delivery and to convert chronically ill patients from reactive to proactive in managing their own diseases[1]. The CCM is a holistic combination of the six elements combined to foster quality improvement in the following areas: health system, community, self-management support, decision support, delivery system design and clinical information systems. Increasing evidence has shown that changes in, at least, four of the six categories of the CCM led to clear advances in health outcomes[2]. Although some interventions have focused solely on one or two specific components and led to improvements in the development of the CCM[2,3]. This model has been mostly applied to patients with diabetes, congestive heart failure, and chronic obstructive pulmonary disease with evidence in the United States of America and Australia showing that the patients benefited from healthcare adjustments guided by the CCM[1,4,5]. The Improvement Chronic Illness Care at the MacColl Center for Health Care Innovation, which designed the CCM, also developed assessment tools such as the Assessment of Chronic Illness Care (ACIC) to be completed by healthcare workers and the Patient Assessment of Chronic Illness Care (PACIC) to be completed by patients. A previous study (currently under review) conducted by our research group in the emirate of Abu Dhabi used the ACIC to understand the perception of healthcare workers on the development of the CCM in the delivery of chronic care to patients with diabetes, cardiovascular diseases, and cancer. The study found that Abu Dhabi's health system has a reasonably good support for chronic illness care. It was a mixed method study, comprising a quantitative and a qualitative part. The participants scored the subcomponents of the CCM completing the ACIC and were asked about the subcomponents (priorities) of the CCM through a semi-structured interview guide based on the ACIC. The barriers of the present study emerged from this previous one.

A modified Delphi technique was performed to identify and rank the top 5 priorities and barriers from an initial list of 28 priority areas and 20 barriers. The present study represents the first consensus exercise using a modified Delphi technique to identify the top five priorities and barriers for chronic care in the health system of Abu Dhabi, UAE.

## Purpose and rationale

One of the key strategic goals of the UAE Vision 2021 National Agenda is to achieve a world-class healthcare system. The main rationale for this study was the need to conduct the first consensus exercise with key stakeholders to understand the role of the CCM in Abu Dhabi's healthcare system. The primary aim was to use a modified Delphi technique to identify and subsequently rank the priorities and barriers of the CCM in Abu Dhabi's healthcare system, UAE, in order to achieve a full support for chronic illnesses. Utilizing a health policy prioritization approach to strengthen the health services requires proper and focused policymaking. Therefore, the modified Delphi technique sought to elucidate the five most significant priorities and barriers identified by participants that can be used to facilitate policy-making and health care reform in Abu Dhabi, UAE.

## Prevention of bias

To maximize privacy and confidentiality, all participants were provided with an individual keypad ((Keepad Interactive, NSW, Australia) to electronically log their responses. The software is extremely efficient in terms of avoiding missing data, as the number of people who answered each question appears at the corner of the slideshow. The polling results for each question can be shown in real-time to the participants; however, in this study the participants did not receive any feedback until they were presented with the reduced list of priorities and barriers at the start of the subsequent round. The researchers conducting the modified Delphi technique did not have any conflicts of interest, so there was no need for an independent research team to coordinate the study.

## REPORTING

### Expert panel

A purposive sample of 20 health systems' experts on the Abu Dhabi emirate health system was used to perform the modified Delphi technique. The inclusion criteria to be considered as a health systems' expert was: speak and understand English, work in the public or private sector of the healthcare system in Abu Dhabi, work in the same facility for more than one year and work in the delivery of care to patients with diabetes, cardiovascular or cancer. The participants were invited to attend three brief meetings to complete the three interactive rounds of the modified Delphi technique.

1  
2  
3 The majority of the participants were females (70%), nurses (37.5%), working in the public  
4 sector (93.3%) and in the Eastern Region of Al Ain (81.3%). The average years of experience  
5 were 14.8±13.7 years and the mean working time in the same facility was 6.3±3.3 years.  
6  
7

### 8 9 **Description of the methods**

10 The modified Delphi method itself starts with a series of questionnaires used to identify a list of  
11 topics. Through an interactive process of nominal scoring, they are reduced until a pre-specified  
12 number of topics remain to be ranked in order of priority, and finishes when consensus has been  
13 established at a sufficient level[6,7]. This technique supports health policy decision-making and  
14 has been used previously to reach expert consensus on definitions, guidelines, and strategies for  
15 occupational health, elderly care, rural health, palliative care, primary health care, migrant  
16 health, diabetes, and medical professionalism (10-19). This paper follows the recently published  
17 Guidelines to Conduct and REport Delphi Studies (CREDES)[8].  
18  
19

20 Study researchers prepared tables with the priorities and barriers to be provided for the  
21 participants on arrival. They also performed a pilot test of the modified Delphi technique to  
22 ensure the correct configuration and set-up of the wireless voting system through the PowerPoint  
23 presentation using the TurningPoint software, which has specific configurations for the type of  
24 question to be addressed and works as an interface with the wireless keypads. The participants  
25 used these individual computer-linked electronic keypads to vote and rank the priorities and  
26 barriers. The information provided from each wireless keypad was automatically logged on the  
27 computer system and the results (i.e. frequency and percentage) were provided immediately.  
28 After each round, the researchers analyzed the results to prepare the reduced list of tables and the  
29 PowerPoint presentation for the next round of the modified Delphi study.  
30  
31  
32  
33  
34  
35  
36  
37  
38  
39  
40  
41  
42

### 43 **Procedure and definition of consensus**

44 Three brief meetings were conducted to execute the three selection rounds and achieve  
45 consensus through this technique. Each of the three rounds was conducted in three separate  
46 consecutive days where the priorities and barriers were voted to reach the “top five” by the end  
47 of the third meeting. At the start of each meeting, two colored sheets with the priorities and  
48 barriers on a table with a *Likert scale* (yellow for priorities and blue for barriers) were delivered  
49 for the participants on arrival. The participants were asked to use the colored sheets to score the  
50 priorities and barriers according to the provided *Likert scale* ‘not very relevant’, ‘relevant’ or  
51  
52  
53  
54  
55  
56  
57  
58  
59



1  
2  
3 'very relevant'. Once all the participants had completed the *Likert scale* on the paper, wireless  
4 keypads were distributed and oral instructions about how to use them were given in order to  
5 record their answers. At the end of the first round, the researchers reviewed the results of each  
6 priority subcomponent and barrier that were voted 'very relevant', 'relevant' or 'not very  
7 relevant', according to participants' previous handwriting choices (on the given colored paper).  
8 The priorities and barriers that were considered 'very relevant' by at least 30% of the participants  
9 were selected for the next round. In this case, from the 28 priorities, there was a reduced to 16  
10 and from the 20 barriers to 14. During the second round, the participants were asked to repeat the  
11 process and identify the five most relevant priorities and barriers by marking them as 'very  
12 relevant'. The five priorities and barriers with the highest percentage of participants ranking  
13 them as 'very relevant' were selected to be ranked in the third round. Three of the priority  
14 subcomponents: 'Improvement strategy for chronic illness care', 'evidence-based guidelines' and  
15 'patient treatment plans' received the same proportion of votes. As a result of this tie, seven  
16 priorities were selected for the final rank (Figure 1).  
17  
18  
19  
20  
21  
22  
23  
24  
25  
26  
27

### 28 **WHAT ARE THE TOP FIVE PRIORITY AREAS TO INTERVENE?**

29  
30 Table 1 shows that the 26.3% of expert participants selected the 'overall organizational  
31 leadership in chronic illness care' as the most important priority subcomponent of the CCM to  
32 address. The two subcomponents 'continuity of care' and 'effective behavior change  
33 interventions and peer-support' were voted as the second priority by 21.1% of the participants  
34 leading to a tie in the priority rank. The 'evidence-based guidelines' was voted as the third most  
35 important priority by 15.8% of the participants. The subcomponent 'improvement strategy for  
36 chronic illness care' was voted as the fourth most important priority by 10.5% and the  
37 subcomponent 'provider education for chronic illness care' was voted as the fifth by 5.3% of the  
38 participants.  
39  
40  
41  
42  
43  
44  
45

46 **Table 1:** Round 3 results: top five priorities subcomponents of the CCM.  
47

| 48 Rank | 49 Percentage | 50 Priorities                                             |
|---------|---------------|-----------------------------------------------------------|
| 51 1    | 26.3%         | Overall Organizational Leadership in Chronic Illness Care |
| 52 2    | 21.1%         | Continuity of care                                        |
| 53 2    | 21.1%         | Effective behavior change interventions and peer support  |
| 54 3    | 15.8%         | Evidence-based guidelines                                 |

|   |       |                                               |
|---|-------|-----------------------------------------------|
| 4 | 10.5% | Improvement strategy for chronic illness care |
| 5 | 5.3%  | Provider education for chronic illness care   |

### WHAT ARE THE TOP FIVE BARRIERS TO THE DEVELOPMENT OF THE CCM?

‘Patient compliance’ was voted as the most important barrier to the development of the CCM by 36.8% of the participants. ‘Lack of standardized processes/procedures’ was voted as the second barrier by 31.6% of the participants, ‘differences between insurances’ was voted as the third barrier by 15.8% of the participants, ‘lack of regional plans and standardizing guidelines between facilities’ was voted to be the fourth barrier by 10.5% of the participants and ‘lack of monitoring’ was voted as the fifth barrier by 5.3% of the participants (Table 2).

**Table 2:** Round 3 results: top five barriers of the CCM.

| Rank | Percentage | Barriers                                                           |
|------|------------|--------------------------------------------------------------------|
| 1    | 36.8%      | Patient compliance                                                 |
| 2    | 31.6%      | Lack of standardized processes/procedures                          |
| 3    | 15.8%      | Differences between insurances                                     |
| 4    | 10.5%      | Lack of regional plans standardizing guidelines between facilities |
| 5    | 5.3%       | Lack of monitoring                                                 |

### DISCUSSION

Among the six elements of the CCM that enclose the 28 subcomponents that the expert participants voted and ranked, the element “health system” was present twice in the subcomponents ‘overall organizational leadership in chronic illness care’ and ‘improvement strategy for chronic illness care’, while the elements “delivery system design”, “self-management”, and “decision support” appeared once linked to the other subcomponents. The elements “clinical system design” and “community” were not represented in the final priorities.

The ‘overall organizational leadership in chronic illness care’ was the subcomponent ranked as the most important priority to address, relating to health system organization and different leadership models. According to Lapão and colleagues (2017), the development of a healthcare organization is directly proportional to the leadership process, the professional's management ability, the incentives and the resources available[9]. The aim of any health system is to have higher awareness and more proactive participation of the managers. In order to provide the right environment to approach the managers and the health professionals exploring the dynamics of

1  
2  
3 the relationships is crucial. Especially between leadership values, culture, capabilities and the  
4 organizational context, supporting a high level of self, team and organizational awareness[9–11].  
5 A study in Iran used the Delphi technique to facilitate designing an excellence and quality model  
6 for a primary health care training center[12]. The study authors also found that leadership was  
7 the component with most sub-criteria. Another Delphi study in South Africa (2013), identified  
8 governance and leadership as the most important priority and the fifth-ranked challenge to  
9 intervene in care provision in rural areas[13]. One should recognize that although “leadership” is  
10 now a clearer concept its operationalization is still not mature, which can explain some of the  
11 difficulties acknowledged by health organizations[14]. This first subcomponent (‘overall  
12 organizational leadership in chronic illness care’) is linked with the fourth priority ‘improvement  
13 strategy for chronic illness care’. This ‘improvement strategy for chronic illness care’ is a core  
14 base of the CCM, addressing the need for the healthcare system reorganization to face the  
15 growing problem of chronic diseases. The development of the CCM advocates organizational  
16 changes in health delivery to a patient-centered model where, for example, the patient has a  
17 proactive role managing their own disease (e.g. through access to their personal health data), all  
18 the providers are able to see patients information in their workstations and agree to follow the  
19 same guidelines and treatments with patients agreement[1]. This example and suggestion of an  
20 ‘improvement strategy for chronic illness care’ integrate four of the six elements of the CCM  
21 (delivery system design, clinical information system, decision support, and self-management).  
22 Further analysis should be conducted to design an appropriate improvement strategy for each  
23 healthcare services center. ‘Continuity of care’ was ranked as the second most important priority  
24 and it shows the perception of the experts for the need of a change in the delivery system design.  
25 In the Abu Dhabi health system, a patient is not allocated to a specific family medicine  
26 physician; rather, the family medicine physician working at the chronic care clinics, often does  
27 not follow the same patient every time the patient reaches the system which causes a lack of  
28 continuity of care from the perspective of the doctor-patient relation. ‘Effective behavior change  
29 interventions and peer support’ was also ranked as the second most important priority. In the  
30 United Kingdom, Spain or in Portugal, there is a general practitioner, or family medicine doctor,  
31 attributed to each person according to the residency area who acts as the first line of contact  
32 between the patient and the health system[15–17]. This allows the doctor to know their patient’s  
33 history (and families), establish a relationship with them and to promote behavior changes that  
34  
35  
36  
37  
38  
39  
40  
41  
42  
43  
44  
45  
46  
47  
48  
49  
50  
51  
52  
53  
54  
55  
56  
57  
58  
59  
60

1  
2  
3 are in the base of the prevention of the chronic diseases[16]. Implementing a similar general  
4 practitioner/family medicine physician model in Abu Dhabi may improve the continuity of care  
5 and enhance the effectiveness of behavior change interventions.  
6  
7

8  
9 ‘Evidence-based guidelines’ was considered the third most important priority to improve the care  
10 of chronic diseases in Abu Dhabi, however, the UAE was a pioneer using evidence-based  
11 medicine, the concept was introduced in 1998[18]. One of the reasons for this subcomponent to  
12 be ranked as a priority might be the multinational origin of the healthcare workers, who tend to  
13 follow the guidelines of the country where they are from and/or trained. For example, physicians  
14 from North America may follow the North American guidelines related to a specific chronic  
15 disease. A previous study concluded that the diagnosis and management of type 2 diabetes  
16 differed substantially between the United States of America, United Kingdom, and Germany[19].  
17 Despite this issue, the competent health authority should have the mission to regulate and  
18 develop the healthcare sector and the individuals working within the health systems[20].  
19 “Evidence-based guidelines” is also related to electronic health records and decision-support  
20 systems that might help health professionals improve their performance, in terms of better  
21 decisions and time.  
22  
23

24  
25 ‘Patient compliance’ was identified by the participants as the most important barrier. A study  
26 conducted in the Netherlands (2012) with the aim of understanding the development and  
27 coordination of disease management programs, also reported that patient involvement in their  
28 own care as a barrier to implementing the CCM[21]. From the literature, it is known that one  
29 way to address patient compliance is through patient education and participation[22,23]. The  
30 patient needs to be able to understand that they can have a proactive role in the management of  
31 their own disease if they are provided with self-management support sessions (the “how to  
32 comply”).  
33  
34

35  
36 A ‘lack of standardized processes/procedures’ was considered to be the second most relevant  
37 barrier and there is a need to integrate the delivery of care with the clinical systems for all  
38 professionals working in the health system. Also, this barrier seems to be related to the third one:  
39 ‘differences between insurances’. Although health insurance is mandatory in the emirate of Abu  
40 Dhabi, there are different insurance packages depending on the type of employment and  
41 residence visa. These different insurance packages provide access to different coverage and  
42  
43  
44  
45  
46  
47  
48  
49  
50  
51  
52  
53  
54  
55  
56  
57  
58  
59  
60

1  
2  
3 access to services. For example, diabetes education or lactation consultations are not available  
4 for patients with the lower health insurances, which makes the delivery of care not standardized  
5 for the healthcare workers, as they are not able to provide the same procedure to all the patients.  
6 The ‘differences between insurances’ was also considered a barrier by Haggstrom and colleagues  
7 (2012) when they assessed the CCM implementation for cancer screening in community centers  
8 in the United States of America[24]. The ‘lack of regional plans standardizing the guidelines  
9 between the facilities’ was considered to be the fourth barrier. Similarly to other models, like the  
10 Portuguese or the Saudi Arabian health system[9,25], the Abu Dhabi’s publicly funded health  
11 system seems to have a centralized organizational model[26] where all the facilities with the  
12 same level of care follow the same instructions: decisions tend to be centered in the  
13 administration of a whole group. The decentralized model is when the facilities have some  
14 degree of autonomy, as for example, in Rio de Janeiro, Brazil[9]. In this case, further work inside  
15 the organization, engaging top managers, and healthcare workers are needed to understand why  
16 the same level of care following the same directions is not provided in all facilities. The barrier  
17 ranked as the fifth most important barrier was ‘lack of monitoring’. This barrier is linked to the  
18 ‘lack of standardized processes/procedures’ and shows that the healthcare workers and clinical  
19 directors feel the need for monitoring and feedback of their performance, interventions or  
20 implemented measures. There is also the need to examine the effectiveness and efficiency of the  
21 different communication channels, both horizontally and vertically, within an organization.  
22 Hroszkoski and colleagues (2006) also in the United States of America, reported barriers related  
23 to the ‘lack of monitoring’ when they implemented the CCM in a group of 18 clinics: insufficient  
24 time to measure the change, lack of measures to assess change, and a lack of specific details and  
25 desired care changes[27].  
26  
27  
28  
29  
30  
31  
32  
33  
34  
35  
36  
37  
38  
39  
40  
41  
42  
43

44 This paper addresses one of the UAE’s Vision 2021 agenda aims which is to achieve a world-  
45 class healthcare system. It is hoped that our findings of the priorities and barriers of the CCM  
46 implementation in the Abu Dhabi health system will contribute to the continuous improvement  
47 of the quality of healthcare delivery both for the patient and healthcare workers. In addition, the  
48 UAE can serve as an example for other high income and/or rapidly developing countries facing  
49 the same challenges within their health system.  
50  
51  
52  
53  
54  
55  
56  
57  
58  
59  
60

1  
2  
3 **Strengths:** The wireless computer-linked keypads ensured participant privacy and  
4 confidentiality during the modified Delphi technique and this should have minimized response  
5 bias. In addition, completing the study over three consecutive days, as opposed to weeks and  
6 months required with a postal or email methodology, resulted in a 95% response rate and a low  
7 attrition rate. Overall, our methodology using wireless handheld keypads enabled a rapid  
8 consensus process to effectively identify priorities and barriers for the CCM in Abu Dhabi's  
9 health system. There are at least three previous studies that have used a Delphi technique in the  
10 UAE to reach consensus on occupational health (10), elderly care (15), and medical  
11 professionalism [28–30]; however, our study is the first to use a modified Delphi technique to  
12 elucidate the priorities and barriers of the CCM in Abu Dhabi's healthcare system.  
13  
14  
15  
16  
17  
18  
19  
20

21 **Limitations:** One of the limitations of this modified Delphi technique is the requirement for the  
22 participants to be physically present, which can introduce a selection bias if the attendance  
23 reduces significantly during the rounds[30]. However, the response rate in this study was 95%,  
24 as from day one to the end of the study only one participant was absent, round 2 and 3 had 19  
25 participants instead of 20. Another limitation is the inability to generalize our results to the health  
26 systems operating in other emirates in the UAE, but that was not the purpose of this study.  
27  
28  
29  
30  
31

### 32 **Adequacy of conclusions**

33  
34 The modified Delphi technique achieved the aim of identifying the priorities and barriers of the  
35 CCM in Abu Dhabi's healthcare system; specifically, 'Overall Organizational Leadership in  
36 Chronic Illness Care' was ranked as the top priority and 'Patient Compliance' as the most  
37 important barrier. This study represents an important step in the process of understanding the key  
38 barriers and priority areas for intervention to maximize the development of the CCM in the  
39 health system of Abu Dhabi.  
40  
41  
42  
43  
44

45 **Funding** This research received no specific grant from any funding agency in the public,  
46 commercial or not-for-profit sectors.  
47  
48

49 **Competing interests** There are no competing interests.  
50  
51

52 **Acknowledgments** The authors would like to thank the twenty health systems experts that  
53 participate in our study.  
54  
55  
56  
57  
58  
59  
60

**Contributors.** MSP, TL and LVL designed the study. MSP and TL collected the data. MSP analyzed the data and wrote the first draft of the manuscript. TL and LVL gave significant intellectual contributions for the final draft. All the authors read critically the content of this manuscript and approved this final version for publication.

**Data sharing statement** No additional data available.

**Reporting guidelines** Conducting and REporting DElphi Studies – CREDES.

## REFERENCES

- 1 Coleman K, Austin BT, Brach C, *et al.* Evidence on the Chronic Care Model in the new millennium. *Health Aff* 2009;**28**:75–85. doi:10.1377/hlthaff.28.1.75
- 2 Wagner EH, Austin BT, Davis C, *et al.* Improving chronic illness care: Translating evidence into action. *Health Aff* 2001;**20**:64–78. doi:10.1377/hlthaff.20.6.64
- 3 Hung DY, Rundall TG, Tallia AF, *et al.* Rethinking prevention in primary care: applying the chronic care model to address health risk behaviors. *Milbank Q* 2007;**85**:69–91. doi:10.1111/j.1468-0009.2007.00477.x
- 4 Asch SM, Baker DW, Keesey JW, *et al.* Does the collaborative model improve care for chronic heart failure? *Med Care* 2005;**43**:667–75. doi:10.1097/01.mlr.0000167182.72251.a1
- 5 Renders CM, Valk GD, Griffin SJ, *et al.* Interventions to improve the management of diabetes in primary care, outpatient, and community settings: A systematic review. *Diabetes Care* 2001;**24**:1821–33. doi:10.2337/diacare.24.10.1821
- 6 Hsu C-C, Sandford B. The Delphi technique. *Prat Assess Res Eval* 2007;**12**:273–300. doi:10.1080/02688867.1988.9726654
- 7 Lalloo D, Demou E, Kiran S, *et al.* Core competencies for UK occupational health nurses: a Delphi study. *Occup Med Public Heal Nurs (Occupational Heal* 2016;**66**:649–55. doi:10.1093/occmed/kqw089
- 8 Jünger S, Payne SA, Brine J, *et al.* Guidance on Conducting and Reporting Delphi Studies

- (CREDES) in palliative care: Recommendations based on a methodological systematic review. *Palliat Med* 2017;:26921631769068. doi:10.1177/0269216317690685
- 9 Lapão LV, Arcêncio RA, Popolin MP, *et al.* Atenção Primária à Saúde na coordenação das Redes de Atenção à Saúde no Rio de Janeiro, Brasil, e na região de Lisboa, Portugal. *Cien Saude Colet* 2017;**22**:713–24. doi:10.1590/1413-81232017223.33532016
- 10 Starfield B. *Atencao Primaria: equilibrio entre necessidades de saude, servicos e tecnologia*. Brasilia: : UNESCO Brasil 2002.
- 11 Al-Sawai A. Leadership of healthcare professionals: Where do we stand? *Oman Med J* 2013;**28**:285–7. doi:10.5001/omj.2013.79
- 12 Tabrizi J-S, Farahbakhsh M, Shahgoli J, *et al.* Designing Excellence and Quality Model for Training Centers of Primary Health Care: A Delphi Method Study. *Iran J Public Health* 2015;**44**:1367–75.
- 13 Versteeg M, du Toit L, Couper I. Building consensus on key priorities for rural health care in South Africa using the Delphi technique. *Glob Health Action* 2013;**6**:19522. doi:10.3402/gha.v6i0.19522
- 14 Lapão L, Dussault G. PACES: a national leadership program in support of primary-care reform in Portugal. *Leadersh Heal Serv* 2011;**21**:295–307. doi:10.1108/17511871111172349
- 15 Onion DK, Berrington RM. Comparisons of UK General Practice and US Family Practice. *J MAmerican Board Fam Med* 1999;**12**.<http://www.jabfm.org/content/12/2/162.full.pdf> (accessed 10 Apr 2017).
- 16 Santos I, Qualidade I De, Desempenho I De, *et al.* Indicadores de desempenho na consulta. *Rev Port Med Geral e Fam* 2009;:227–35.
- 17 Silva Miguel L, Brito de Sa A. *Cuidados de Saúde Primários em 2011-2016: reforçar, expandir Contribuição para o Plano Nacional de Saúde 2011-2016*. Lisboa: : Alto Comissariado do Ministerio da Saude 2010. <http://1nj5ms2lli5hdggbe3mm7ms5.wpengine.netdna-cdn.com/files/2010/08/CSP1.pdf>



- (accessed 10 Apr 2017).
- 18 Al-Almaie SM, Al-Baghli NA. Evidence based medicine: an overview. *J Family Community Med* 2003;**10**:17–24.<http://www.ncbi.nlm.nih.gov/pubmed/23011987> (accessed 12 Apr 2017).
- 19 von dem Knesebeck O, Gerstenberger E, Link C, *et al.* Differences in the diagnosis and management of type 2 diabetes in 3 countries (US, UK, and Germany): results from a factorial experiment. *Med Care* 2010;**48**:321–6. doi:<http://dx.doi.org/10.1097/MLR.0b013e3181ca3ffc>
- 20 Health Authority Abu Dhabi, Dhahi A. Health Statistics 2013. Abu Dhabi: 2014. [http://www.haad.ae/HAAD/LinkClick.aspx?fileticket=LrAOka\\_Zx3Q=&tabid=349](http://www.haad.ae/HAAD/LinkClick.aspx?fileticket=LrAOka_Zx3Q=&tabid=349)
- 21 Kadu MK, Stolee P. Facilitators and barriers of implementing the chronic care model in primary care: a systematic review. *BMC Fam Pr* 2015;**16**:12. doi:10.1186/s12875-014-0219-0
- 22 Atreja A, Bellam N, Levy SR. Strategies to enhance patient adherence: making it simple. *MedGenMed* 2005;**7**:4.<http://www.ncbi.nlm.nih.gov/pubmed/16369309> (accessed 10 Apr 2017).
- 23 Gold DT, McClung B. Approaches to Patient Education: Emphasizing the Long-Term Value of Compliance and Persistence. *Am J Med* 2006;**119**:S32–7. doi:10.1016/j.amjmed.2005.12.021
- 24 Haggstrom DA, Taplin SH, Monahan P, *et al.* Chronic Care Model implementation for cancer screening and follow-up in community health centers. *J Health Care Poor Underserved* 2012;**23**:49–66. doi:10.1353/hpu.2012.0131
- 25 Alkabba AF, Hussein GMA, Albar AA, *et al.* The major medical ethical challenges facing the public and healthcare providers in Saudi Arabia. *J Fam Community Med* 2012;**1**:1–6. doi:10.4103/2230-8229.94003
- 26 SEHA. Annual Report 2013. Abu Dhabi: 2013. [https://www.seha.ae/English/aboutus/annualreport/Pages/AR\\_2013/SEHA\\_AR-13.pdf](https://www.seha.ae/English/aboutus/annualreport/Pages/AR_2013/SEHA_AR-13.pdf)

- 1  
2  
3 27 Solberg LI, Crain AL, Sperl-hillen JM, *et al.* Care Quality and Implementation of the  
4 Chronic Care Model: A Quantitative Study. 2006;:310–6.  
5 doi:10.1370/afm.571.INTRODUCTION  
6  
7  
8  
9 28 Abdel-Razig S, Ibrahim H, Alameri H, *et al.* Creating a Framework for Medical  
10 Professionalism: An Initial Consensus Statement From an Arab Nation. *J Grad Med Educ*  
11 2016;**8**:165–72. doi:10.4300/JGME-D-15-00310.1  
12  
13  
14  
15 29 Al Shemeili S, Klein S, Strath A, *et al.* A modified Delphi study of structures and  
16 processes related to medicines management for elderly hospitalised patients in the United  
17 Arab Emirates. *J Eval Clin Pract* 2016;**22**:781–91. doi:10.1111/jep.12542  
18  
19  
20  
21 30 Aw T-C, Loney T, Elias A, *et al.* Use of an audience response system to maximise  
22 response rates and expedite a modified Delphi process for consensus on occupational  
23 health. *J Occup Med Toxicol* 2016;**11**:9. doi:10.1186/s12995-016-0098-5  
24  
25  
26  
27  
28  
29

## 30 FIGURES

31 **Figure 1:** Delphi technique rounds procedure.  
32  
33  
34  
35  
36  
37  
38  
39  
40  
41  
42  
43  
44  
45  
46  
47  
48  
49  
50  
51  
52  
53  
54  
55  
56  
57  
58  
59  
60

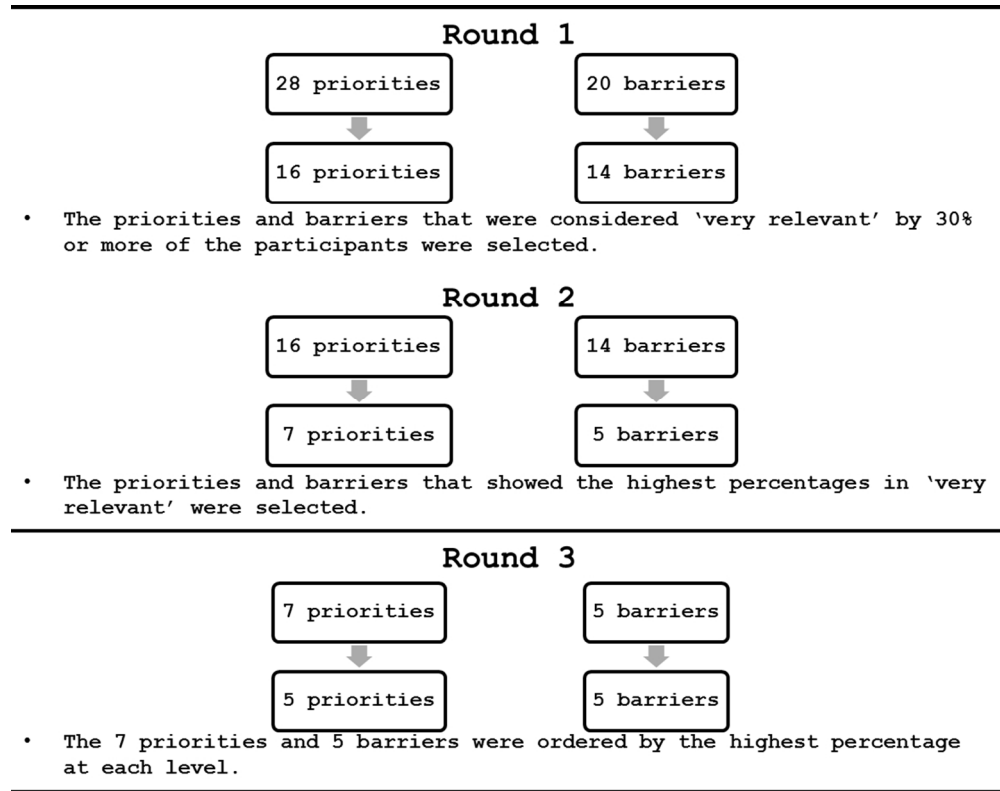

32 Delphi technique rounds procedure

33 199x157mm (150 x 150 DPI)

**Box 3. Recommendations for the Conducting and Reporting of Delphi Studies (CREDES)[1].**

## Rationale for the choice of the Delphi technique

1. *Justification.* The choice of the Delphi technique as a method of systematically collating expert consultation and building consensus needs to be well justified. When selecting the method to answer a particular research question, it is important to keep in mind its constructivist nature

## Planning and design

2. *Planning and process.* The Delphi technique is a flexible method and can be adjusted to the respective research aims and purposes. Any modifications should be justified by a rationale and be applied systematically and rigorously
3. *Definition of consensus.* Unless not reasonable due to the explorative nature of the study, an a priori criterion for consensus should be defined. This includes a clear and transparent guide for action on (a) how to proceed with certain items or topics in the next survey round, (b) the required threshold to terminate the Delphi process and (c) procedures to be followed when consensus is (not) reached after one or more iterations

## Study conduct

4. *Informational input.* All material provided to the expert panel at the outset of the project and throughout the Delphi process should be carefully reviewed and piloted in advance in order to examine the effect on experts' judgements and to prevent bias
5. *Prevention of bias.* Researchers need to take measures to avoid directly or indirectly influencing the experts' judgements. If one or more members of the research team have a conflict of interest, entrusting an independent researcher with the main coordination of the Delphi study is advisable
6. *Interpretation and processing of results.* Consensus does not necessarily imply the 'correct' answer or judgement; (non)consensus and stable disagreement provide informative insights and highlight differences in perspectives concerning the topic in question
7. *External validation.* It is recommended to have the final draft of the resulting guidance on best practice in palliative care reviewed and approved by an external board or authority before publication and dissemination

## Reporting

8. *Purpose and rationale.* The purpose of the study should be clearly defined and demonstrate the appropriateness of the use of the Delphi technique as a method to achieve the research aim. A rationale for the choice of the Delphi technique as the most suitable method needs to be provided. **Page 5**
9. *Expert panel.* Criteria for the selection of experts and transparent information on recruitment of the expert panel, socio-demographic details including information on expertise regarding the topic in question, (non)response and response rates over the ongoing iterations should be reported **Page 5**
10. *Description of the methods.* The methods employed need to be comprehensible; this includes information on preparatory steps (How was available evidence on the topic in question synthesised?), piloting of material and survey instruments, design of the survey instrument(s), the number and design of survey rounds, methods of data analysis, processing and synthesis of experts' responses to inform the subsequent survey round and methodological decisions taken by the research team throughout the process **Page 6**
11. *Procedure.* Flow chart to illustrate the stages of the Delphi process, including a preparatory phase, the actual 'Delphi rounds', interim steps of data processing and analysis, and concluding steps **Page 6**
12. *Definition and attainment of consensus.* It needs to be comprehensible to the reader how consensus was achieved throughout the process, including strategies to deal with non-consensus **Page 6**
13. *Results.* Reporting of results for each round separately is highly advisable in order to make the evolving of consensus over the rounds transparent. This includes figures showing the average group response, changes between rounds, as well as any modifications of the survey instrument such as deletion, addition or modification of survey items based on previous rounds **Page 7**
14. *Discussion of limitations.* Reporting should include a critical reflection of potential limitations and their impact of the resulting guidance **Page 8/11**
15. *Adequacy of conclusions.* The conclusions should adequately reflect the outcomes of the Delphi study with a view to the scope and applicability of the resulting practice guidance **Page 12**
16. *Publication and dissemination.* The resulting guidance on good practice in palliative care should be clearly identifiable from the publication, including recommendations for transfer into practice and implementation. If the publication does not allow for a detailed presentation of either the resulting practice guidance or the methodological features of the applied Delphi technique, or both, reference to a more detailed presentation elsewhere should be made (e.g. availability of the full guideline from the authors or online; publication of a separate paper reporting on methodological details and particularities of the process (e.g. persistent disagreement and controversy on certain issues)). A dissemination plan should include endorsement of the guidance by professional associations and health care authorities to facilitate implementation

\*Consolidated criteria for reporting qualitative research

\*\*Consolidated Standards of Reporting Trials

1  
2  
3  
4  
5  
6  
7  
8  
9  
10  
11  
12  
13  
14  
15  
16  
17  
18  
19  
20  
21  
22  
23  
24  
25  
26  
27  
28  
29  
30  
31  
32  
33  
34  
35  
36  
37  
38  
39  
40  
41  
42  
43  
44  
45  
46  
47  
48  
49  
50  
51  
52  
53  
54  
55  
56  
57  
58  
59  
60

[1] Jünger S, Payne SA, Brine J, *et al.* Guidance on Conducting and Reporting Delphi Studies (CREDES) in palliative care: Recommendations based on a methodological systematic review. *Palliat Med* 2017;:26921631769068. doi:10.1177/0269216317690685

For peer review only

# BMJ Open

## PUSHING CHRONIC CARE FORWARD IN ABU DHABI BY IDENTIFYING PRIORITIES AND ADDRESSING BARRIERS: A MODIFIED DELPHI TECHNIQUE

|                                 |                                                                                                                                                                                                                                                                                                                                                                                                                                                                                                                                                                    |
|---------------------------------|--------------------------------------------------------------------------------------------------------------------------------------------------------------------------------------------------------------------------------------------------------------------------------------------------------------------------------------------------------------------------------------------------------------------------------------------------------------------------------------------------------------------------------------------------------------------|
| Journal:                        | <i>BMJ Open</i>                                                                                                                                                                                                                                                                                                                                                                                                                                                                                                                                                    |
| Manuscript ID                   | bmjopen-2017-020189.R1                                                                                                                                                                                                                                                                                                                                                                                                                                                                                                                                             |
| Article Type:                   | Research                                                                                                                                                                                                                                                                                                                                                                                                                                                                                                                                                           |
| Date Submitted by the Author:   | 25-Jan-2018                                                                                                                                                                                                                                                                                                                                                                                                                                                                                                                                                        |
| Complete List of Authors:       | Paulo, Marília; United Arab Emirates University College of Medicine and Health Sciences, Institute of Public Health; Universidade Nova de Lisboa Instituto de Higiene e Medicina Tropical, Global Health and Tropical Medicine<br>Loney, Tom; United Arab Emirates University College of Medicine and Health Sciences, Institute of Public Health; Mohammed Bin Rashid University of Medicine and Health Sciences College of Medicine<br>Lapão, Luis ; Instituto de Higiene e Medicina Tropical - Universidade Nova de Lisboa, Global Health and Tropical Medicine |
| <b>Primary Subject Heading</b>: | Health services research                                                                                                                                                                                                                                                                                                                                                                                                                                                                                                                                           |
| Secondary Subject Heading:      | Health policy, Health services research                                                                                                                                                                                                                                                                                                                                                                                                                                                                                                                            |
| Keywords:                       | Health policy < HEALTH SERVICES ADMINISTRATION & MANAGEMENT, Organisation of health services < HEALTH SERVICES ADMINISTRATION & MANAGEMENT, Organisational development < HEALTH SERVICES ADMINISTRATION & MANAGEMENT, International health services < HEALTH SERVICES ADMINISTRATION & MANAGEMENT                                                                                                                                                                                                                                                                  |
|                                 |                                                                                                                                                                                                                                                                                                                                                                                                                                                                                                                                                                    |

SCHOLARONE™  
Manuscripts

1  
2  
3  
4 **PUSHING CHRONIC CARE FORWARD IN ABU DHABI BY IDENTIFYING**  
5 **PRIORITIES AND ADDRESSING BARRIERS: A MODIFIED DELPHI TECHNIQUE**

6 Marília Silva Paulo<sup>1,2\*</sup> (MSc), Tom Loney<sup>2,3</sup> (PhD) and Luís V. Lapão<sup>1,4</sup> (PhD)  
7  
8  
9

10 <sup>1</sup>Global Health and Tropical Medicine, Instituto de Higiene e Medicina Tropical, Universidade  
11 Nova de Lisboa, Lisboa, Portugal  
12  
13

14 <sup>2</sup>Institute of Public Health, College of Medicine and Health Sciences, United Arab Emirates  
15 University, United Arab Emirates  
16  
17

18 <sup>3</sup>College of Medicine, Mohammed Bin Rashid University of Medicine and Health Sciences,  
19 Dubai Healthcare City, Dubai, United Arab Emirates  
20  
21  
22

23 <sup>4</sup>World Health Organization Collaborating Center for Health Workforce Policy and Planning,  
24 Lisbon, Portugal  
25  
26

27 **Word count:** 3445  
28

29  
30 **\* Address for Correspondence:**  
31

32 Marília Silva Paulo  
33

34  
35 Institute of Public Health, College of Medicine and Health Sciences, United Arab Emirates  
36 University, United Arab Emirates  
37  
38

39 Office. +971 03 767 74 99; Mobile. +971 050 241 86 46; E-mail: [mariliap@uaeu.ac.ae](mailto:mariliap@uaeu.ac.ae)  
40  
41  
42  
43  
44  
45  
46  
47  
48  
49  
50  
51  
52  
53  
54  
55  
56  
57  
58  
59  
60

## ABSTRACT

**Objectives** This study aimed to elucidate the top five key priorities and barriers for chronic care in the health system of Abu Dhabi, United Arab Emirates (UAE).

**Design** A modified Delphi study was performed to reach consensus on priority areas and barriers for the development of the Chronic Care Model in the health system of Abu Dhabi. Individual wireless audience response devices (keypads) linked to a computer were used to reduce 28 priorities and 20 barriers to the top five during 3 iterative rounds over 3 consecutive days.

**Setting** Chronic care services for patients with diabetes, cardiovascular diseases, and cancer, in both private and publicly funded healthcare services in the emirate of Abu Dhabi.

**Participants** A purposive sample of twenty health systems' experts was recruited. They were healthcare workers from the public and private sector working in the delivery of care for patients with diabetes, cardiovascular diseases, and cancer.

**Results** The 'overall organizational leadership in chronic illness care' was ranked as the most important priority to address (26.3%) and 'patient compliance' was ranked as the most important barrier (36.8%) for the development of the Chronic Care Model.

**Conclusions** This study has identified the current priorities and barriers to improving chronic care within Abu Dhabi's healthcare system. Our paper addresses the UAE's 2021 Agenda of achieving a world-class healthcare system and findings may help inform strategic changes required to achieve this mission.

### Strengths and limitations of this study:

- To our knowledge, this study is the first to use a modified Delphi technique to reach consensus on the health system in Abu Dhabi.
- Use of the wireless computer-linked keypads ensured participant privacy and confidentiality during the consensus exercise.
- A purposive sample of twenty healthcare experts was chosen to represent the healthcare workers population providing daily care to chronic patients. However, the sample was not a random sample; therefore, the results cannot be generalized.



## INTRODUCTION

The Chronic Care Model (CCM) is a comprehensive model that integrates six elements to facilitate the delivery of high-quality care. Each element has its own strategic and developmental concepts to enhance the health outcomes of populations with chronic illness. This model was designed to help primary health care (PHC) practices improve health outcomes by changing the routine of care delivery and to convert chronically ill patients from reactive to proactive in managing their own diseases[1]. The CCM is a holistic combination of the six elements combined to foster quality improvement in the following areas: health system, community, self-management support, decision support, delivery system design and clinical information systems. Increasing evidence has shown that changes in at least four of the six categories of the CCM led to clear advances in health outcomes[2]. Some interventions have focused on one or two specific CCM components and these studies also showed improvements in the development of the CCM[2,3]. This model has been mostly applied to patients with diabetes, congestive heart failure, and chronic obstructive pulmonary disease with evidence in the United States of America and Australia showing that the patients benefited from healthcare adjustments guided by the CCM[1,4,5].

A previous study (currently under review) conducted by our research group in the emirate of Abu Dhabi used the Assessment of Chronic Illness Care (ACIC) to understand the perception of healthcare workers on the development of the CCM in the delivery of chronic care to patients with diabetes, cardiovascular diseases, and cancer. The study found that Abu Dhabi's health system has reasonably good support for chronic illness care. It was a mixed method study, comprising a quantitative and a qualitative part. The study participants scored the subcomponents of the CCM completing the ACIC and were asked about the subcomponents (priorities) of the CCM through a semi-structured interview guide based on the ACIC. The priorities and barriers used in the present study emerged from earlier work conducted by our research group.

Abu Dhabi is the largest emirate of the United Arab Emirates (UAE) in terms of territory and population. The UAE and emirate of Abu Dhabi have an unusual population pyramid, characterized by a young population and a disproportion of genders[6,7]. In Abu Dhabi, only 18.2% of the residents are UAE nationals and the majority (67.3%) are under the age of 30 years

1  
2  
3 [8]. Although the UAE has a young population compared to similar high-income/ developed  
4 countries, the UAE is facing the growing problem of chronic diseases related to lifestyles i.e.  
5 obesity, diabetes, cardiovascular diseases, and cancer. In 2016, the age-standardized prevalence  
6 of diabetes was 25.4% for UAE nationals and 15.2% for expats, and cardiovascular diseases  
7 accounted for 37.1% of all the deaths in the emirate[8]. The government of the UAE has set  
8 health targets through the UAE Vision 2021. One of the key strategic goals of the UAE Vision  
9 2021 National Agenda is to achieve a world-class healthcare system. Specific to chronic diseases  
10 this will be achieved by decreasing the prevalence of obesity amongst children, the overall  
11 prevalence of diabetes, and the number of deaths from cardiovascular diseases [9]. All seven  
12 UAE emirates (Abu Dhabi, Dubai, Sharjah, Ajman, Umm al Quwain, Ras Al-Khaima, and  
13 Fujairah) are working towards achieving these. The UAE healthcare system is regulated at both  
14 Federal and Emirate level having multiple regulators and providers depending on the emirate[6].  
15 For these reasons, our study is focused on only one emirate, Abu Dhabi, and we are used the  
16 CCM as a framework to improve chronic care. To our knowledge, our study is the first  
17 addressing the CCM in the emirate of Abu Dhabi.  
18  
19  
20  
21  
22  
23  
24  
25  
26  
27  
28  
29

30 A modified Delphi technique was performed to identify and rank the top 5 priorities and barriers  
31 from an initial list of 28 priority areas and 20 barriers. The present study represents the first  
32 consensus exercise using a modified Delphi technique to identify the top five priorities and  
33 barriers for chronic care in the health system of Abu Dhabi, UAE.  
34  
35  
36  
37

### 38 **Purpose and rationale**

39 The main rationale for this study was the need to conduct the first consensus exercise with key  
40 stakeholders to understand the role of the CCM in one of the UAE's largest emirates – Abu  
41 Dhabi. The primary aim was to use a modified Delphi technique to identify and subsequently  
42 rank the priorities and barriers of the CCM in Abu Dhabi's healthcare system, UAE. Utilizing a  
43 health policy prioritization approach to strengthening the health services requires proper and  
44 focused policymaking. Therefore, the modified Delphi technique sought to elucidate the five  
45 most significant priorities and barriers identified by participants that can be used to facilitate  
46 policy-making and health care reform in Abu Dhabi, UAE.  
47  
48  
49  
50  
51  
52  
53  
54  
55  
56  
57  
58  
59  
60

### **Prevention of bias**

To maximize privacy and confidentiality, all participants were provided with an individual wireless keypad (Keepad Interactive, NSW, Australia) to electronically log their responses to each question and round of the Delphi study. Our study design maximizes response rates and minimizes missing data as the software displays the number of people who answered each question in the corner of the polling slide. The polling results for each question can be shown in real-time to the participants; however, in this study, the participants did not receive any feedback until they were presented with the reduced list of priorities and barriers at the start of the subsequent round. The researchers conducting the modified Delphi technique did not have any conflicts of interest; hence, there was no need for an independent research team to coordinate the study. This study was approved by the competent Ethical Committee and all the participants signed the informed consent to be part of the study.

## **REPORTING**

### **Expert panel**

A purposive sample of 20 health systems' experts on the Abu Dhabi emirate health system was recruited to perform the modified Delphi technique. These 20 participants were considered experts by their epistemic expertise, which was defined by Weinstein as "the capacity to provide strong justification for a range of propositions in a domain"[10]. The inclusion criteria to be considered as a health systems' expert was: work in the public or private sector of the healthcare system in Abu Dhabi; work in the same facility for more than one year; work in the delivery of care to patients with diabetes, cardiovascular or cancer; and speak and understand English. The participants were invited to attend three brief meetings to complete the three interactive rounds of the modified Delphi technique.

The majority of the participants were females (70%), nurses (37.5%), working in the public sector (70%) and in the Al Ain (Eastern Region) of Abu Dhabi (81.3%). The average years of experience were  $14.8 \pm 13.7$  years and the mean working time in the same facility was  $6.3 \pm 3.3$  years.

### Description of the methods

The modified Delphi method itself starts with a series of questionnaires used to identify a list of topics. Through an interactive process of nominal scoring, the topics are reduced until a pre-specified number of topics remain to be ranked in order of priority, and the process finishes when consensus has been established at a sufficient level[11,12]. This technique supports health policy decision-making and has been used previously to reach expert consensus on definitions, guidelines, and strategies for occupational health, elderly care, rural health, palliative care, primary health care, migrant health, diabetes, and medical professionalism (10-19). This paper follows the recently published Guidelines to Conduct and REport DELphi Studies (CREDES)[13].

Study researchers printed sheets of A4 paper with the priorities and barriers and these were provided to the participants on arrival. The research team also performed a pilot test of the Keypad computer software for the modified Delphi technique to ensure the correct configuration and set-up of the wireless voting system through the PowerPoint presentation. The Keypad software has specific configurations for the type of question to be addressed and works as an interface with the wireless keypads. The participants used these individual computer-linked electronic keypads to vote and rank the priorities and barriers. The information provided from each wireless keypad was automatically logged on the computer system and the results (i.e. frequency and percentage) were provided immediately to the researchers. After each round, the researchers analyzed the results to prepare the reduced list of tables and the PowerPoint presentation for the next round of the modified Delphi study.

### Procedure and definition of consensus

Three brief meetings were conducted to execute the three selection rounds and achieve consensus through this technique. Each of the three rounds was conducted over three separate consecutive days where the priorities and barriers were voted to reach the “top five” by the end of the third meeting. At the start of each meeting, two colored sheets with the priorities and barriers on a table with a three-point *Likert scale* (yellow for priorities and blue for barriers) were given to the participants on arrival. The participants were asked to use the colored sheets to score the priorities and barriers according to the provided three-point *Likert scale* ‘not very relevant’, ‘relevant’ or ‘very relevant’. Once all the participants had completed the *Likert scale* on the

1  
2  
3 paper, wireless keypads were distributed and oral instructions about how to use them were given  
4 in order to record their answers. At the end of the first round, the researchers reviewed the results  
5 of each priority subcomponent and barrier that were voted 'very relevant', 'relevant' or 'not very  
6 relevant', according to participants' previous handwriting choices (on the given colored paper).  
7  
8 The priorities and barriers that were considered 'very relevant' by at least 30% of the participants  
9 were selected for the next round. In this case, 28 priorities were reduced to 16 priorities, and 20  
10 barriers were reduced to 14 barriers. During the second round, participants were asked to repeat  
11 the process and identify the five most relevant priorities and barriers by marking them as 'very  
12 relevant'. The five priorities and barriers with the highest percentage of participants ranking  
13 them as 'very relevant' were selected to be ranked in the third round. Three of the priority  
14 subcomponents: 'Improvement strategy for chronic illness care', 'evidence-based guidelines' and  
15 'patient treatment plans' received the same proportion of votes. As a result of this tie, seven  
16 priorities were selected for the final ranking exercise in round three (Figure 1).  
17  
18  
19  
20  
21  
22  
23  
24  
25

### 26 **WHAT ARE THE TOP FIVE PRIORITY AREAS TO INTERVENE?**

27  
28 Table 1 shows that the 26.3% of expert participants selected the 'overall organizational  
29 leadership in chronic illness care' as the most important priority subcomponent of the CCM to  
30 address. The two subcomponents 'continuity of care' and 'effective behavior change  
31 interventions and peer-support' were voted as the second priority by 21.1% of the participants  
32 leading to a tie in the priority rank. The 'evidence-based guidelines' was voted as the third most  
33 important priority by 15.8% of the participants. The subcomponent 'improvement strategy for  
34 chronic illness care' was voted as the fourth most important priority by 10.5% and the  
35 subcomponent 'provider education for chronic illness care' was voted as the fifth by 5.3% of the  
36 participants.  
37  
38  
39  
40  
41  
42  
43  
44

45 **Table 1:** Round 3 results: top five priority subcomponents of the CCM.

| 46 Rank | 47 Percentage | 48 Priorities                                             |
|---------|---------------|-----------------------------------------------------------|
| 49 1    | 26.3%         | Overall Organizational Leadership in Chronic Illness Care |
| 50 2    | 21.1%         | Continuity of care                                        |
| 51 2    | 21.1%         | Effective behavior change interventions and peer support  |
| 52 3    | 15.8%         | Evidence-based guidelines                                 |
| 53 4    | 10.5%         | Improvement strategy for chronic illness care             |

|   |      |                                             |
|---|------|---------------------------------------------|
| 5 | 5.3% | Provider education for chronic illness care |
|---|------|---------------------------------------------|

## WHAT ARE THE TOP FIVE BARRIERS TO THE DEVELOPMENT OF THE CCM?

‘Patient compliance’ was voted as the most important barrier to the development of the CCM by 36.8% of participants. ‘Lack of standardized processes/procedures’ was voted as the second most important barrier by 31.6% of the participants, ‘differences between insurances’ was voted as the third most important barrier by 15.8% of the participants, ‘lack of regional plans and standardizing guidelines between facilities’ was voted as the fourth most important barrier by 10.5% of the participants, and a ‘lack of monitoring’ was voted as the fifth most important barrier by 5.3% of the participants (Table 2).

**Table 2:** Round 3 results: top five barriers of the CCM.

| Rank | Percentage | Barriers                                                           |
|------|------------|--------------------------------------------------------------------|
| 1    | 36.8%      | Patient compliance                                                 |
| 2    | 31.6%      | Lack of standardized processes/procedures                          |
| 3    | 15.8%      | Differences between insurances                                     |
| 4    | 10.5%      | Lack of regional plans standardizing guidelines between facilities |
| 5    | 5.3%       | Lack of monitoring                                                 |

## DISCUSSION

Our study used a modified Delphi technique to reach consensus on the priorities and barriers for the development of the CCM within Abu Dhabi’s health system. The CCM is composed of six elements with 28 subcomponents that the expert participants voted and ranked. The element “health system” was present twice during the Delphi process in the subcomponents ‘overall organizational leadership in chronic illness care’ and ‘improvement strategy for chronic illness care’, while the elements “delivery system design”, “self-management”, and “decision support” appeared once linked to the other subcomponents. The elements “clinical system design” and “community” were not represented in the final priorities.

The ‘overall organizational leadership in chronic illness care’ was the subcomponent ranked as the most important priority to address, relating to health system organization and different leadership models. According to Lapão and colleagues (2017), the development of a healthcare organization is directly proportional to the leadership process, the professional's management ability, the incentives and the resources available[14]. The term “leadership” is now a clearer

1  
2  
3 concept; however, its operationalization is still not mature and this may explain some of the  
4 difficulties acknowledged by health organizations[15]. The highest ranked subcomponent  
5 ('overall organizational leadership in chronic illness care') is linked with the fourth ranked  
6 priority 'improvement strategy for chronic illness care'. 'Improvement strategy for chronic  
7 illness care' addresses the need for the healthcare system reorganization to face the growing  
8 problem of chronic diseases. The development of the CCM advocates organizational changes in  
9 health delivery to a patient-centered model where the patient has a proactive role managing their  
10 own disease.. In the patient-centered model, all the providers are able to see patient information  
11 in their workstations and agree to follow the same guidelines and treatments with patient  
12 agreement[1]. This example integrates four of the six elements of the CCM (delivery system  
13 design, clinical information system, decision support, and self-management). 'Continuity of care'  
14 was ranked as the second most important priority and it shows the perception of the experts for  
15 the need to change the delivery system design. In the Abu Dhabi health system, a patient is not  
16 allocated to a specific family medicine physician; the family medicine physician working at the  
17 chronic care clinics often does not follow the same patient every time causing a lack of  
18 continuity of care from the perspective of the doctor-patient relationship. 'Effective behavior  
19 change interventions and peer support' was also ranked as the second most important priority. In  
20 the United Kingdom, Spain and Portugal, there is a general practitioner, or family medicine  
21 doctor, attributed to each person according to the residency area who acts as the first line of  
22 contact (or the 'gatekeeper') between the patient and the health system[16–18]. This allows the  
23 doctor to know their patient's history (and families), establish a relationship with them, and to  
24 promote behavior changes that are in the base of chronic disease prevention [17]. 'Evidence-  
25 based guidelines' was considered the third most important priority to improve the care of chronic  
26 diseases in Abu Dhabi; however, the UAE was a pioneer using evidence-based medicine, the  
27 concept was introduced in 1998[19]. One of the reasons for this subcomponent to be ranked as a  
28 priority might be the multinational origin of the healthcare workforce, who tend to follow the  
29 guidelines of the country where they are from and/or trained. For example, physicians from  
30 North America may follow the North American guidelines related to a specific chronic disease.  
31 'Evidence-based guidelines' is also related to electronic health records and decision-support  
32 systems that might help health professionals improve their performance, in terms of better  
33 decisions and time management.  
34  
35  
36  
37  
38  
39  
40  
41  
42  
43  
44  
45  
46  
47  
48  
49  
50  
51  
52  
53  
54  
55  
56  
57  
58  
59  
60

1  
2  
3 'Patient compliance' was identified by the participants as the most important barrier. A study  
4 conducted in the Netherlands (2012) with the aim of understanding the development and  
5 coordination of disease management programs, also reported that patient involvement in their  
6 own care as a barrier to implementing the CCM[20]. From the literature, it is known that one  
7 way to address patient compliance is through patient education and participation[21,22]. A 'lack  
8 of standardized processes/procedures' was considered to be the second most relevant barrier and  
9 there is a need to integrate the delivery of care with the clinical systems for all professionals  
10 working in the health system. Also, this barrier seems to be related to the third ranked barrier:  
11 'differences between insurances'. Although health insurance is mandatory in the emirate of Abu  
12 Dhabi, there are different insurance packages depending on the type of employment, monthly  
13 income, and residence visa. These different insurance packages provide access to different  
14 coverage plans and services. For example, diabetes education or lactation consultations are not  
15 available for patients with the lower health insurance plan, which makes the delivery of care not  
16 standardized for the healthcare workers, as they are not able to provide the same procedure to all  
17 patients. The 'differences between insurances' was also considered a barrier by Haggstrom and  
18 colleagues (2012) when they assessed the CCM implementation for cancer screening in  
19 community centers in the United States of America[23]. The 'lack of regional plans  
20 standardizing the guidelines between the facilities' was considered to be the fourth barrier. Abu  
21 Dhabi's publicly funded health system seems to have a centralized organizational model where  
22 further work inside the organization to engage top managers, and healthcare workers is needed to  
23 understand why the same level of care following the same directions is not provided in all  
24 facilities. The barrier ranked as the fifth most important barrier was a 'lack of monitoring'. This  
25 barrier is linked to the 'lack of standardized processes/procedures' and shows that the healthcare  
26 workers and clinical directors feel the need for monitoring and feedback on their performance,  
27 interventions or implemented measures. This findings suggests that there is the need to examine  
28 the effectiveness and efficiency of the different communication channels, both horizontally and  
29 vertically, within an organization. Hroszkoski and colleagues (2006) in the United States of  
30 America, reported barriers related to the 'lack of monitoring' when they implemented the CCM  
31 in a group of 18 clinics: insufficient time to measure the change, lack of measures to assess  
32 change, and a lack of specific details and desired care changes[24].It is hoped that our findings  
33 on the priorities and barriers of the CCM implementation in the Abu Dhabi health system will  
34  
35  
36  
37  
38  
39  
40  
41  
42  
43  
44  
45  
46  
47  
48  
49  
50  
51  
52  
53  
54  
55  
56  
57  
58  
59  
60



1  
2  
3 contribute to the continuous improvement of the quality of healthcare delivery both for the  
4 patient and healthcare workers. The UAE can serve as an example for other high income and/or  
5 rapidly developing countries. The leadership stability, the availability and proper allocation of  
6 the resources, and the long-term economic and social strategies allowed the implementation of  
7 successful healthcare strategies creating an international competitive health system. To improve  
8 the delivery of care to chronic patients in the emirate of Abu Dhabi the development of a  
9 healthcare strategy to achieve the UAE Vision 2021 is recommended. Based on the modified  
10 Delphi and the CCM premises it would be recommended that a strategy includes:  
11  
12  
13  
14  
15  
16  
17

- 18 • ongoing training for middle and executive managers on standardized leadership and  
19 communication skills;
- 20 • designing an appropriate improvement strategy for each healthcare service center with  
21 the patient at the center of the care;
- 22 • implementing a general practitioner/family medicine physician model in healthcare  
23 centers in Abu Dhabi;
- 24 • ensuring the use of the evidence-based guidelines;
- 25 • increasing the number of health educators to provide all patients with self-management  
26 support sessions to help them understand their proactive role managing their own disease  
27 (“how to comply”);
- 28 • healthcare facilities for types of insurances ensuring that healthcare workers can provide  
29 the highest level of standardized and quality care regardless of the patient’s health  
30 insurance (this already happens in some cases);
- 31 • establishing a monitoring process for healthcare workers with integrated feedback linked  
32 to team and facilities objectives (it is already used in some facilities Abu Dhabi).  
33  
34  
35  
36  
37  
38  
39  
40  
41  
42  
43  
44

45 It is believed that these strategies can be applied to other health systems facing the same  
46 challenges of an ageing population coupled with high levels of lifestyle-related chronic diseases.  
47 Our findings also highlight some important concepts (continuity of care, differences between  
48 insurances) required to globally achieve universal health coverage.  
49  
50  
51

52 **Strengths:** The wireless computer-linked keypads ensured participant privacy and  
53 confidentiality during the modified Delphi technique and this should have minimized response  
54  
55  
56  
57  
58  
59  
60

1  
2  
3 bias. In addition, completing the study over three consecutive days, as opposed to weeks and  
4 months required with a postal or email methodology, resulted in a 95% response rate and a low  
5 attrition rate. Overall, our methodology using wireless handheld keypads enabled a rapid  
6 consensus process to effectively identify priorities and barriers for the CCM in Abu Dhabi's  
7 health system. There are at least three previous studies that have used a Delphi technique in the  
8 UAE to reach consensus on occupational health [25], elderly care [26], and medical  
9 professionalism [26–28]; however, our study is the first to use a modified Delphi technique to  
10 elucidate the priorities and barriers of the CCM in Abu Dhabi's healthcare system.

11  
12  
13  
14  
15  
16  
17  
18 **Limitations:** One of the limitations of this modified Delphi technique is the requirement for the  
19 participants to be physically present, which can introduce a selection bias if the attendance  
20 reduces significantly during the rounds[28]. However, the response rate in this study was 95%,  
21 as from day one to the end of the study only one participant was absent, round 2 and 3 had 19  
22 participants instead of 20. Another limitation is the inability to generalize our results to the health  
23 systems operating in other emirates in the UAE, but that was not the purpose of this study.

### 24 25 26 27 28 29 **Adequacy of conclusions**

30 The modified Delphi technique achieved the aim of identifying the priorities and barriers of the  
31 CCM in Abu Dhabi's healthcare system; specifically, 'Overall Organizational Leadership in  
32 Chronic Illness Care' was ranked as the top priority and 'Patient Compliance' as the most  
33 important barrier. This study represents an important step in the process of understanding the key  
34 barriers and priority areas for interventions to maximize the development of the CCM in the  
35 health system of Abu Dhabi emirate in the UAE.

36  
37  
38  
39  
40  
41  
42 **Funding** This research received no specific grant from any funding agency in the public,  
43 commercial or not-for-profit sectors.

44  
45  
46 **Competing interests** The authors declare any competing interests.

47  
48  
49  
50 **Acknowledgments** The authors would like to thank the twenty health systems experts that  
51 participate in our study.

52  
53  
54  
55  
56  
57 **Contributors.** MSP, TL and LVL designed the study. MSP and TL collected the data. MSP  
58 analyzed the data and wrote the first draft of the manuscript. TL and LVL gave significant  
59 intellectual contributions for the final draft.

1  
2  
3 **Reporting guidelines** Conducting and REporting DElphi Studies – CREDES.  
4

5  
6 **Data sharing** No additional data available.  
7

8 **REFERENCES**  
9

- 10 1 Coleman K, Austin BT, Brach C, *et al.* Evidence on the Chronic Care Model in the new  
11 millennium. *Health Aff* 2009;**28**:75–85. doi:10.1377/hlthaff.28.1.75  
12  
13  
14 2 Wagner EH, Austin BT, Davis C, *et al.* Improving chronic illness care: Translating  
15 evidence into action. *Health Aff* 2001;**20**:64–78. doi:10.1377/hlthaff.20.6.64  
16  
17  
18 3 Hung DY, Rundall TG, Tallia AF, *et al.* Rethinking prevention in primary care: applying  
19 the chronic care model to address health risk behaviors. *Milbank Q* 2007;**85**:69–91.  
20 doi:10.1111/j.1468-0009.2007.00477.x  
21  
22  
23  
24 4 Asch SM, Baker DW, Keeseey JW, *et al.* Does the collaborative model improve care for  
25 chronic heart failure? *Med Care* 2005;**43**:667–75.  
26 doi:10.1097/01.mlr.0000167182.72251.a1  
27  
28  
29  
30 5 Renders CM, Valk GD, Griffin SJ, *et al.* Interventions to improve the management of  
31 diabetes in primary care, outpatient, and community settings: A systematic review.  
32 *Diabetes Care* 2001;**24**:1821–33. doi:10.2337/diacare.24.10.1821  
33  
34  
35  
36 6 Paulo MS, Loney T, Lapão LV. The primary health care in the emirate of Abu Dhabi: are  
37 they aligned with the chronic care model elements? *BMC Health Serv Res* 2017;**17**:725.  
38 doi:10.1186/s12913-017-2691-4  
39  
40  
41  
42 7 Koornneef E, Robben P, Blair I. Progress and outcomes of health systems reform in the  
43 United Arab Emirates: a systematic review. *BMC Health Serv Res* 2017;**17**:672.  
44 doi:10.1186/s12913-017-2597-1  
45  
46  
47  
48 8 Health Authority Abu Dhabi. Health Statistics 2016. Abu Dhabi: 2017.  
49  
50  
51 9 Prime Minister’s Office. World-Class Healthcare | UAE Vision 2021.  
52 2016.<https://www.vision2021.ae/en/national-priority-areas/world-class-healthcare>  
53 (accessed 8 Jan 2018).  
54  
55  
56  
57  
58  
59  
60

- 1  
2  
3 10 Weinstein BD. What is an expert? *Theor Med* 1993;**14**:57–  
4 73.<http://www.ncbi.nlm.nih.gov/pubmed/8506540> (accessed 8 Jan 2018).  
5  
6  
7 11 Hsu C-C, Sandford B. The Delphi technique. *Prat Assess Res Eval* 2007;**12**:273–300.  
8 doi:10.1080/02688867.1988.9726654  
9  
10  
11 12 Laloo D, Demou E, Kiran S, *et al*. Core competencies for UK occupational health nurses:  
12 a Delphi study. *Occup Med Public Heal Nurs (Occupational Heal* 2016;**66**:649–55.  
13 doi:10.1093/occmed/kqw089  
14  
15  
16 13 Jünger S, Payne SA, Brine J, *et al*. Guidance on Conducting and Reporting Delphi Studies  
17 (CREDES) in palliative care: Recommendations based on a methodological systematic  
18 review. *Palliat Med* 2017;**22**:26921631769068. doi:10.1177/0269216317690685  
19  
20  
21 14 Lapão LV, Arcêncio RA, Popolin MP, *et al*. Atenção Primária à Saúde na coordenação  
22 das Redes de Atenção à Saúde no Rio de Janeiro, Brasil, e na região de Lisboa, Portugal.  
23 *Cien Saude Colet* 2017;**22**:713–24. doi:10.1590/1413-81232017223.33532016  
24  
25  
26 15 Lapão L, Dussault G. PACES: a national leadership program in support of primary-care  
27 reform in Portugal. *Leadersh Heal Serv* 2011;**21**:295–307.  
28 doi:10.1108/175118711111172349  
29  
30  
31 16 Onion DK, Berrington RM. Comparisons of UK General Practice and US Family Practice.  
32 *J MAmerican Board Fam Med* 1999;**12**.<http://www.jabfm.org/content/12/2/162.full.pdf>  
33 (accessed 10 Apr 2017).  
34  
35  
36 17 Santos I, Qualidade I De, Desempenho I De, *et al*. Indicadores de desempenho na  
37 consulta. *Rev Port Med Geral e Fam* 2009;**22**:27–35.  
38  
39  
40 18 Silva Miguel L, Brito de Sa A. *Cuidados de Saúde Primários em 2011-2016: reforçar,  
41 expandir Contribuição para o Plano Nacional de Saúde 2011-2016*. Lisboa: : Alto  
42 Comissariado do Ministerio da Saude 2010.  
43 <http://1nj5ms2lli5hdggbe3mm7ms5.wpengine.netdna-cdn.com/files/2010/08/CSP1.pdf>  
44 (accessed 10 Apr 2017).  
45  
46  
47 19 Al-Almaie SM, Al-Baghli NA. Evidence based medicine: an overview. *J Family*  
48  
49  
50  
51  
52  
53  
54  
55  
56  
57  
58  
59  
60

- 1  
2  
3 *Community Med* 2003;**10**:17–24.<http://www.ncbi.nlm.nih.gov/pubmed/23011987>  
4 (accessed 12 Apr 2017).  
5  
6  
7  
8 20 Kadu MK, Stolee P. Facilitators and barriers of implementing the chronic care model in  
9 primary care: a systematic review. *BMC Fam Pr* 2015;**16**:12. doi:10.1186/s12875-014-  
10 0219-0  
11  
12  
13 21 Atreja A, Bellam N, Levy SR. Strategies to enhance patient adherence: making it simple.  
14 *MedGenMed* 2005;**7**:4.<http://www.ncbi.nlm.nih.gov/pubmed/16369309> (accessed 10 Apr  
15 2017).  
16  
17  
18  
19 22 Gold DT, McClung B. Approaches to Patient Education: Emphasizing the Long-Term  
20 Value of Compliance and Persistence. *Am J Med* 2006;**119**:S32–7.  
21 doi:10.1016/j.amjmed.2005.12.021  
22  
23  
24  
25 23 Haggstrom DA, Taplin SH, Monahan P, *et al.* Chronic Care Model implementation for  
26 cancer screening and follow-up in community health centers. *J Health Care Poor*  
27 *Underserved* 2012;**23**:49–66. doi:10.1353/hpu.2012.0131  
28  
29  
30  
31 24 Solberg LI, Crain AL, Sperl-hillen JM, *et al.* Care Quality and Implementation of the  
32 Chronic Care Model: A Quantitative Study. 2006;:310–6.  
33 doi:10.1370/afm.571.INTRODUCTION  
34  
35  
36  
37 25 Lalloo D, Demou E, Kiran S, *et al.* International perspective on common core  
38 competencies for occupational physicians: a modified Delphi study. *Occup Environ Med*  
39 2016;:1–7. doi:10.1136/oemed-2015-103285  
40  
41  
42  
43 26 Al Shemeili S, Klein S, Strath A, *et al.* A modified Delphi study of structures and  
44 processes related to medicines management for elderly hospitalised patients in the United  
45 Arab Emirates. *J Eval Clin Pract* 2016;**22**:781–91. doi:10.1111/jep.12542  
46  
47  
48  
49 27 Abdel-Razig S, Ibrahim H, Alameri H, *et al.* Creating a Framework for Medical  
50 Professionalism: An Initial Consensus Statement From an Arab Nation. *J Grad Med Educ*  
51 2016;**8**:165–72. doi:10.4300/JGME-D-15-00310.1  
52  
53  
54  
55 28 Aw T-C, Loney T, Elias A, *et al.* Use of an audience response system to maximise  
56  
57  
58  
59  
60

1  
2  
3 response rates and expedite a modified Delphi process for consensus on occupational  
4 health. *J Occup Med Toxicol* 2016;**11**:9. doi:10.1186/s12995-016-0098-5  
5  
6  
7  
8  
9

## 10 **FIGURES**

11  
12 **Figure 1:** Delphi technique rounds procedure.  
13  
14  
15  
16  
17  
18  
19  
20  
21  
22  
23  
24  
25  
26  
27  
28  
29  
30  
31  
32  
33  
34  
35  
36  
37  
38  
39  
40  
41  
42  
43  
44  
45  
46  
47  
48  
49  
50  
51  
52  
53  
54  
55  
56  
57  
58  
59  
60

For peer review only

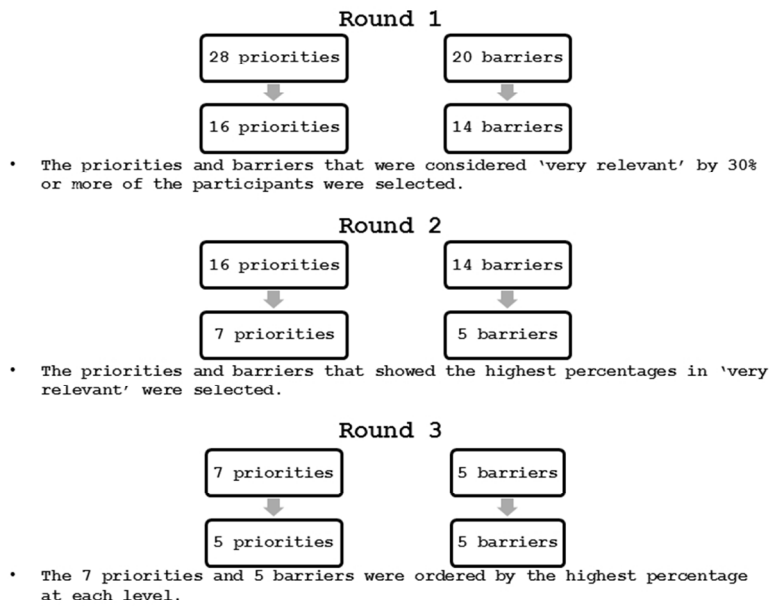

31  
32

Delphi technique rounds procedure.

33  
34

81x60mm (300 x 300 DPI)

35  
36  
37  
38  
39  
40  
41  
42  
43  
44  
45  
46  
47  
48  
49  
50  
51  
52  
53  
54  
55  
56  
57  
58  
59  
60

**Box 3. Recommendations for the Conducting and Reporting of Delphi Studies (CREDES)[1].**

## Rationale for the choice of the Delphi technique

1. *Justification.* The choice of the Delphi technique as a method of systematically collating expert consultation and building consensus needs to be well justified. When selecting the method to answer a particular research question, it is **important** to keep in mind its constructivist nature

## Planning and design

2. *Planning and process.* The Delphi technique is a flexible method and can be adjusted to the respective research aims and purposes. Any modifications should be justified by a rationale and be applied systematically and rigorously
3. *Definition of consensus.* Unless not reasonable due to the explorative nature of the study, an a priori criterion for consensus should be defined. This includes a clear and transparent guide for action on (a) how to proceed with certain items or topics in the next survey round, (b) the required threshold to terminate the Delphi process and (c) procedures to be followed when consensus is (not) reached after one or more iterations

## Study conduct

4. *Informational input.* All material provided to the expert panel at the outset of the project and throughout the Delphi process should be carefully reviewed and piloted in advance in order to examine the effect on experts' judgements and to prevent bias
5. *Prevention of bias.* Researchers need to take measures to avoid directly or indirectly influencing the experts' judgements. If one or more members of the research team have a conflict of interest, entrusting an independent researcher with the main coordination of the Delphi study is advisable
6. *Interpretation and processing of results.* Consensus does not necessarily imply the 'correct' answer or judgement; (non)consensus and stable disagreement provide informative insights and highlight differences in perspectives concerning the topic in question
7. *External validation.* It is recommended to have the final draft of the resulting guidance on best practice in palliative care reviewed and approved by an external board or authority before publication and dissemination

## Reporting

8. *Purpose and rationale.* The purpose of the study should be clearly defined and demonstrate the appropriateness of the use of the Delphi technique as a method to achieve the research aim. A rationale for the choice of the Delphi technique as the most suitable method needs to be provided. **Page 5**
9. *Expert panel.* Criteria for the selection of experts and transparent information on recruitment of the expert panel, socio-demographic details including information on expertise regarding the topic in question, (non)response and response rates over the ongoing iterations should be reported **Page 5**
10. *Description of the methods.* The methods employed need to be comprehensible; this includes information on preparatory steps (How was available evidence on the topic in question synthesised?), piloting of material and survey instruments, design of the survey instrument(s), the number and design of survey rounds, methods of data analysis, processing and synthesis of experts' responses to inform the subsequent survey round and methodological decisions taken by the research team throughout the process **Page 6**
11. *Procedure.* Flow chart to illustrate the stages of the Delphi process, including a preparatory phase, the actual 'Delphi rounds', interim steps of data processing and analysis, and concluding steps **Page 6**
12. *Definition and attainment of consensus.* It needs to be comprehensible to the reader how consensus was achieved throughout the process, including strategies to deal with non-consensus **Page 6**
13. *Results.* Reporting of results for each round separately is highly advisable in order to make the evolving of consensus over the rounds transparent. This includes figures showing the average group response, changes between rounds, as well as any modifications of the survey instrument such as deletion, addition or modification of survey items based on previous rounds **Page 7**
14. *Discussion of limitations.* Reporting should include a critical reflection of potential limitations and their impact of the resulting guidance **Page 8/11**
15. *Adequacy of conclusions.* The conclusions should adequately reflect the outcomes of the Delphi study with a view to the scope and applicability of the resulting practice guidance **Page 12**
16. *Publication and dissemination.* The resulting guidance on good practice in palliative care should be clearly identifiable from the publication, including recommendations for transfer into practice and implementation. If the publication does not allow for a detailed presentation of either the resulting practice guidance or the methodological features of the applied Delphi technique, or both, reference to a more detailed presentation elsewhere should be made (e.g. availability of the full guideline from the authors or online; publication of a separate paper reporting on methodological details and particularities of the process (e.g. persistent disagreement and controversy on certain issues)). A dissemination plan should include endorsement of the guidance by professional associations and health care authorities to facilitate implementation

\*Consolidated criteria for reporting qualitative research

\*\*Consolidated Standards of Reporting Trials



1  
2  
3  
4  
5  
6  
7  
8  
9  
10  
11  
12  
13  
14  
15  
16  
17  
18  
19  
20  
21  
22  
23  
24  
25  
26  
27  
28  
29  
30  
31  
32  
33  
34  
35  
36  
37  
38  
39  
40  
41  
42  
43  
44  
45  
46  
47  
48  
49  
50  
51  
52  
53  
54  
55  
56  
57  
58  
59  
60

[1] Jünger S, Payne SA, Brine J, *et al.* Guidance on Conducting and Reporting Delphi Studies (CREDES) in palliative care: Recommendations based on a methodological systematic review. *Palliat Med* 2017;:26921631769068. doi:10.1177/0269216317690685

For peer review only

# BMJ Open

## PUSHING CHRONIC CARE FORWARD IN ABU DHABI BY IDENTIFYING PRIORITIES AND ADDRESSING BARRIERS: A MODIFIED DELPHI TECHNIQUE

|                                 |                                                                                                                                                                                                                                                                                                                                                                                                                                                                                                                                                                    |
|---------------------------------|--------------------------------------------------------------------------------------------------------------------------------------------------------------------------------------------------------------------------------------------------------------------------------------------------------------------------------------------------------------------------------------------------------------------------------------------------------------------------------------------------------------------------------------------------------------------|
| Journal:                        | <i>BMJ Open</i>                                                                                                                                                                                                                                                                                                                                                                                                                                                                                                                                                    |
| Manuscript ID                   | bmjopen-2017-020189.R2                                                                                                                                                                                                                                                                                                                                                                                                                                                                                                                                             |
| Article Type:                   | Research                                                                                                                                                                                                                                                                                                                                                                                                                                                                                                                                                           |
| Date Submitted by the Author:   | 15-Mar-2018                                                                                                                                                                                                                                                                                                                                                                                                                                                                                                                                                        |
| Complete List of Authors:       | Paulo, Marília; United Arab Emirates University College of Medicine and Health Sciences, Institute of Public Health; Universidade Nova de Lisboa Instituto de Higiene e Medicina Tropical, Global Health and Tropical Medicine<br>Loney, Tom; United Arab Emirates University College of Medicine and Health Sciences, Institute of Public Health; Mohammed Bin Rashid University of Medicine and Health Sciences College of Medicine<br>Lapão, Luis ; Instituto de Higiene e Medicina Tropical - Universidade Nova de Lisboa, Global Health and Tropical Medicine |
| <b>Primary Subject Heading</b>: | Health services research                                                                                                                                                                                                                                                                                                                                                                                                                                                                                                                                           |
| Secondary Subject Heading:      | Health policy, Health services research                                                                                                                                                                                                                                                                                                                                                                                                                                                                                                                            |
| Keywords:                       | Health policy < HEALTH SERVICES ADMINISTRATION & MANAGEMENT, Organisation of health services < HEALTH SERVICES ADMINISTRATION & MANAGEMENT, Organisational development < HEALTH SERVICES ADMINISTRATION & MANAGEMENT, International health services < HEALTH SERVICES ADMINISTRATION & MANAGEMENT                                                                                                                                                                                                                                                                  |
|                                 |                                                                                                                                                                                                                                                                                                                                                                                                                                                                                                                                                                    |

SCHOLARONE™  
Manuscripts

1  
2  
3  
4 **PUSHING CHRONIC CARE FORWARD IN ABU DHABI BY IDENTIFYING**  
5 **PRIORITIES AND ADDRESSING BARRIERS: A MODIFIED DELPHI TECHNIQUE**

6 Marília Silva Paulo<sup>1,2\*</sup> (MSc), Tom Loney<sup>2,3</sup> (PhD) and Luís V. Lapão<sup>1,4</sup> (PhD)  
7  
8  
9

10 <sup>1</sup>Global Health and Tropical Medicine, Instituto de Higiene e Medicina Tropical, Universidade  
11 Nova de Lisboa, Lisboa, Portugal  
12  
13

14 <sup>2</sup>Institute of Public Health, College of Medicine and Health Sciences, United Arab Emirates  
15 University, United Arab Emirates  
16  
17

18 <sup>3</sup>College of Medicine, Mohammed Bin Rashid University of Medicine and Health Sciences,  
19 Dubai Healthcare City, Dubai, United Arab Emirates  
20  
21  
22

23 <sup>4</sup>World Health Organization Collaborating Center for Health Workforce Policy and Planning,  
24 Lisbon, Portugal  
25  
26

27 **Word count:** 3445  
28

29  
30 **\* Address for Correspondence:**  
31

32 Marília Silva Paulo  
33

34  
35 Institute of Public Health, College of Medicine and Health Sciences, United Arab Emirates  
36 University, United Arab Emirates  
37  
38

39 Office. +971 03 767 74 99; Mobile. +971 050 241 86 46; E-mail: [mariliap@uaeu.ac.ae](mailto:mariliap@uaeu.ac.ae)  
40  
41  
42  
43  
44  
45  
46  
47  
48  
49  
50  
51  
52  
53  
54  
55  
56  
57  
58  
59  
60

## ABSTRACT

**Objectives** This study aimed to elucidate the top five key priorities and barriers for chronic care in the health system of Abu Dhabi, United Arab Emirates (UAE).

**Design** A modified Delphi study was performed to reach consensus on priority areas and barriers for the development of the Chronic Care Model in the health system of Abu Dhabi. Individual wireless audience response devices (keypads) linked to a computer were used to reduce 28 priorities and 20 barriers to the top five during 3 iterative rounds over 3 consecutive days.

**Setting** Chronic care services for patients with diabetes, cardiovascular diseases, and cancer, in both private and publicly funded healthcare services in the emirate of Abu Dhabi.

**Participants** A purposive sample of twenty health systems' experts was recruited. They were frontline healthcare workers from the public and private sector working in the delivery of care for patients with diabetes, cardiovascular diseases, and cancer.

**Results** The 'overall organizational leadership in chronic illness care' was ranked as the most important priority to address (26.3%) and 'patient compliance' was ranked as the most important barrier (36.8%) for the development of the Chronic Care Model.

**Conclusions** This study has identified the current priorities and barriers to improving chronic care within Abu Dhabi's healthcare system. Our paper addresses the UAE's 2021 Agenda of achieving a world-class healthcare system and findings may help inform strategic changes required to achieve this mission.

### Strengths and limitations of this study:

- To our knowledge, this study is the first to use a modified Delphi technique to reach consensus on the health system in Abu Dhabi.
- Use of the wireless computer-linked keypads ensured participant privacy and confidentiality during the consensus exercise.
- A purposive sample of twenty frontline healthcare experts was chosen to represent the healthcare workers population providing daily care to chronic patients. However, the sample was not a random sample; therefore, the results cannot be generalized.

## INTRODUCTION

The Chronic Care Model (CCM) is a comprehensive model that integrates six elements to facilitate the delivery of high-quality care. Each element has its own strategic and developmental concepts to enhance the health outcomes of populations with chronic illness. This model was designed to help primary health care (PHC) practices improve health outcomes by changing the routine of care delivery and to convert chronically ill patients from reactive to proactive in managing their own diseases[1]. The CCM is a holistic combination of the six elements combined to foster quality improvement in the following areas: health system, community, self-management support, decision support, delivery system design and clinical information systems. Increasing evidence has shown that changes in at least four of the six categories of the CCM led to clear advances in health outcomes[2]. Some interventions have focused on one or two specific CCM components and these studies also showed improvements in the development of the CCM[2,3]. This model has been mostly applied to patients with diabetes, congestive heart failure, and chronic obstructive pulmonary disease with evidence in the United States of America and Australia showing that the patients benefited from healthcare adjustments guided by the CCM[1,4,5].

A previous study (currently under review) conducted by our research group in the emirate of Abu Dhabi used the Assessment of Chronic Illness Care (ACIC) to understand the perception of healthcare workers on the development of the CCM in the delivery of chronic care to patients with diabetes, cardiovascular diseases, and cancer. The study found that Abu Dhabi's health system has reasonably good support for chronic illness care. It was a mixed-methods study, comprising a quantitative and a qualitative part. The study participants scored the subcomponents of the CCM completing the ACIC and were asked about the subcomponents (priorities) of the CCM through a semi-structured interview guide based on the ACIC. The priorities and barriers used in the present study emerged from earlier work conducted by our research group.

Abu Dhabi is the largest emirate of the United Arab Emirates (UAE) in terms of territory and population. The UAE and emirate of Abu Dhabi have an unusual population pyramid, characterized by a young population and an imbalance in the sex ratio with approximately four times as many males as females [6,7]. This disproportion of sex within the general population is

1  
2  
3 due to the mass recruitment of expatriate males employed in the industrial and construction  
4 sector. However, there is an equal sex ratio between UAE nationals [6]. In Abu Dhabi, only  
5 18.2% of the residents are UAE nationals and the majority (67.3%) are under the age of 30 years  
6 [8]. Although the UAE has a young population compared to similar high-income/developed  
7 countries, the UAE is facing the growing problem of chronic diseases related to lifestyles i.e.  
8 obesity, diabetes, cardiovascular diseases, and cancer. In 2016, the age-standardized prevalence  
9 of diabetes was 25.4% for UAE nationals and 15.2% for expats, and cardiovascular diseases  
10 accounted for 37.1% of all the deaths in the emirate[8]. The UAE government has set health  
11 targets through the UAE Vision 2021. One of the key strategic goals of the UAE Vision 2021  
12 National Agenda is to achieve a world-class healthcare system. Specific to chronic diseases this  
13 will be achieved by decreasing the prevalence of obesity amongst children, the overall  
14 prevalence of diabetes, and the number of deaths from cardiovascular diseases [9]. All seven  
15 UAE emirates (Abu Dhabi, Dubai, Sharjah, Ajman, Umm al Quwain, Ras Al-Khaima, and  
16 Fujairah) are working towards achieving these goals. The UAE healthcare system is regulated at  
17 both Federal and Emirate level having multiple regulators and providers depending on the  
18 emirate[6]. For these reasons, our study is focused on only one emirate, Abu Dhabi, and we used  
19 the CCM as a framework to improve chronic care. To our knowledge, this study is the first  
20 addressing the CCM in the emirate of Abu Dhabi and this framework may be useful to help the  
21 UAE achieve a world class health system as one of the key strategic goals of the UAE Vision  
22 2021 National Agenda.

23  
24  
25  
26  
27  
28  
29  
30  
31  
32  
33  
34  
35  
36  
37  
38  
39 A modified Delphi technique was performed to identify and rank the top 5 priorities and barriers  
40 from an initial list of 28 priority areas and 20 barriers. The present study represents the first  
41 consensus exercise using a modified Delphi technique to identify the top five priorities and  
42 barriers for chronic care in the health system of Abu Dhabi, UAE.

### 43 44 45 46 **Purpose and rationale**

47  
48 The main rationale for this study was the need to conduct the first consensus exercise with key  
49 stakeholders to understand the role of the CCM in o UAE's largest emirate – Abu Dhabi. The  
50 primary aim was to use a modified Delphi technique to identify and subsequently rank the  
51 priorities and barriers of the CCM in Abu Dhabi's healthcare system, UAE. Utilizing a health  
52 policy prioritization approach to strengthening the health services requires proper and focused  
53  
54  
55  
56  
57  
58  
59  
60

1  
2  
3 policymaking. Therefore, the modified Delphi technique sought to elucidate the five most  
4 significant priorities and barriers identified by participants that can be used to facilitate policy-  
5 making and health care reform in Abu Dhabi, UAE.  
6  
7

### 8 9 **Prevention of bias**

10 To maximize privacy and confidentiality, all participants were provided with an individual  
11 wireless keypad (Keepad Interactive, NSW, Australia) to electronically log their responses to  
12 each question and round of the Delphi study. Our study design maximizes response rates and  
13 minimizes missing data as the software displays the number of people who answered each  
14 question in the corner of the polling slide. The polling results for each question can be shown in  
15 real-time to the participants; however, in this study, the participants did not receive any feedback  
16 until they were presented with the reduced list of priorities and barriers at the start of the  
17 subsequent round. The researchers conducting the modified Delphi technique did not have any  
18 conflicts of interest; hence, there was no need for an independent research team to coordinate the  
19 study. This study was approved by the competent Ethical Committee and all the participants  
20 signed the informed consent to be part of the study.  
21  
22  
23  
24  
25  
26  
27  
28  
29

## 30 31 **REPORTING**

### 32 33 **Expert panel**

34 A purposive sample of 20 frontline health systems' experts on the Abu Dhabi emirate health  
35 system was recruited to perform the modified Delphi technique. These 20 participants were  
36 considered experts by their epistemic expertise, which was defined by Weinstein as "the capacity  
37 to provide strong justification for a range of propositions in a domain"[10]. The inclusion criteria  
38 to be considered as a health systems' expert was: work in the public or private sector of the  
39 healthcare system in Abu Dhabi; work in the same facility for more than one year; work in the  
40 delivery of care to patients with diabetes, cardiovascular or cancer; and speak and understand  
41 English. The participants were invited to attend three brief meetings to complete the three  
42 interactive rounds of the modified Delphi technique.  
43  
44  
45  
46  
47  
48  
49  
50

51 The majority of the participants were females (70%), nurses (37.5%), working in the public  
52 sector (70%) and in the Al Ain (Eastern Region) of Abu Dhabi (81.3%). The average years of  
53  
54  
55  
56  
57  
58  
59  
60

1  
2  
3 experience were  $14.8\pm 13.7$  years and the mean working time in the same facility was  $6.3\pm 3.3$   
4 years.  
5  
6

### 7 **Description of the methods**

8  
9 The modified Delphi method itself starts with a series of questionnaires used to identify a list of  
10 topics. Through an interactive process of nominal scoring, the topics are reduced until a pre-  
11 specified number of topics remain to be ranked in order of priority, and the process finishes  
12 when consensus has been established at a sufficient level [11,12]. This technique supports health  
13 policy decision-making and has been used previously to reach expert consensus on definitions,  
14 guidelines, and strategies for occupational health, elderly care, rural health, palliative care,  
15 primary health care, migrant health, diabetes, and medical professionalism (10-19). This paper  
16 follows the recently published Guidelines to Conduct and REport DELphi Studies  
17 (CREDES)[13].  
18  
19  
20  
21  
22  
23  
24

25 Study researchers printed sheets of A4 paper with the priorities and barriers and these were  
26 provided to the participants on arrival. The research team also performed a pilot test of the  
27 Keypad computer software for the modified Delphi technique to ensure the correct configuration  
28 and set-up of the wireless voting system through the PowerPoint presentation. The Keypad  
29 software has specific configurations for the type of question to be addressed and works as an  
30 interface with the wireless keypads. The participants used these individual computer-linked  
31 electronic keypads to vote and rank the priorities and barriers. The information provided from  
32 each wireless keypad was automatically logged on the computer system and the results (i.e.  
33 frequency and percentage) were provided immediately to the researchers. After each round, the  
34 researchers analyzed the results to prepare the reduced list of tables and the PowerPoint  
35 presentation for the next round of the modified Delphi study.  
36  
37  
38  
39  
40  
41  
42  
43  
44

45 **Patient and Public Involvement** Patients and/or public were not involved.  
46  
47

### 48 **Procedure and definition of consensus**

49 Three brief meetings were conducted to execute the three selection rounds and achieve  
50 consensus through this technique. Each of the three rounds was conducted over three separate  
51 consecutive days where the priorities and barriers were voted to reach the “top five” by the end  
52 of the third meeting. At the start of each meeting, two colored sheets with the priorities and  
53  
54  
55  
56  
57  
58  
59  
60



barriers on a table with a three-point *Likert scale* (yellow for priorities and blue for barriers) were given to the participants on arrival. The participants were asked to use the colored sheets to score the priorities and barriers according to the provided three-point *Likert scale* ‘not very relevant’, ‘relevant’ or ‘very relevant’. Once all the participants had completed the *Likert scale* on the paper, wireless keypads were distributed and oral instructions about how to use them were given in order to record their answers. At the end of the first round, the researchers reviewed the results of each priority subcomponent and barrier that were voted ‘very relevant’, ‘relevant’ or ‘not very relevant’, according to participants’ previous handwriting choices (on the given colored paper). The priorities and barriers that were considered ‘very relevant’ by at least 30% of the participants were selected for the next round. In this case, 28 priorities were reduced to 16 priorities, and 20 barriers were reduced to 14 barriers. During the second round, participants were asked to repeat the process and identify the five most relevant priorities and barriers by marking them as ‘very relevant’. The five priorities and barriers with the highest percentage of participants ranking them as ‘very relevant’ were selected to be ranked in the third round. Three of the priority subcomponents: ‘Improvement strategy for chronic illness care’, ‘evidence-based guidelines’ and ‘patient treatment plans’ received the same proportion of votes. As a result of this tie, seven priorities were selected for the final ranking exercise in round three (Figure 1).

### WHAT ARE THE TOP FIVE PRIORITY AREAS TO INTERVENE?

Table 1 shows that the 26.3% of expert participants selected the ‘overall organizational leadership in chronic illness care’ as the most important priority subcomponent of the CCM to address. The two subcomponents ‘continuity of care’ and ‘effective behavior change interventions and peer-support’ were voted as the second priority by 21.1% of the participants leading to a tie in the priority rank. The ‘evidence-based guidelines’ was voted as the third most important priority by 15.8% of the participants. The subcomponent ‘improvement strategy for chronic illness care’ was voted as the fourth most important priority by 10.5% and the subcomponent ‘provider education for chronic illness care’ was voted as the fifth by 5.3% of the participants.

**Table 1:** Round 3 results: top five priority subcomponents of the CCM.

| Rank | Percentage | Priorities |
|------|------------|------------|
|      |            |            |

|   |       |                                                           |
|---|-------|-----------------------------------------------------------|
| 1 | 26.3% | Overall Organizational Leadership in Chronic Illness Care |
| 2 | 21.1% | Continuity of care                                        |
| 2 | 21.1% | Effective behavior change interventions and peer support  |
| 3 | 15.8% | Evidence-based guidelines                                 |
| 4 | 10.5% | Improvement strategy for chronic illness care             |
| 5 | 5.3%  | Provider education for chronic illness care               |

### WHAT ARE THE TOP FIVE BARRIERS TO THE DEVELOPMENT OF THE CCM?

‘Patient compliance’ was voted as the most important barrier to the development of the CCM by 36.8% of participants. ‘Lack of standardized processes/procedures’ was voted as the second most important barrier by 31.6% of the participants, ‘differences between insurances’ was voted as the third most important barrier by 15.8% of the participants, ‘lack of regional plans and standardizing guidelines between facilities’ was voted as the fourth most important barrier by 10.5% of the participants, and a ‘lack of monitoring’ was voted as the fifth most important barrier by 5.3% of the participants (Table 2).

**Table 2:** Round 3 results: top five barriers of the CCM.

| Rank | Percentage | Barriers                                                           |
|------|------------|--------------------------------------------------------------------|
| 1    | 36.8%      | Patient compliance                                                 |
| 2    | 31.6%      | Lack of standardized processes/procedures                          |
| 3    | 15.8%      | Differences between insurances                                     |
| 4    | 10.5%      | Lack of regional plans standardizing guidelines between facilities |
| 5    | 5.3%       | Lack of monitoring                                                 |

### DISCUSSION

Our study used a modified Delphi technique to reach consensus on the priorities and barriers for the development of the CCM within Abu Dhabi’s health system. The CCM is composed of six elements with 28 subcomponents that the expert participants voted and ranked. The element “health system” was present twice during the Delphi process in the subcomponents ‘overall organizational leadership in chronic illness care’ and ‘improvement strategy for chronic illness care’, while the elements “delivery system design”, “self-management”, and “decision support” appeared once linked to the other subcomponents. The elements “clinical system design” and “community” were not represented in the final priorities.

1  
2  
3 The ‘overall organizational leadership in chronic illness care’ was the subcomponent ranked as  
4 the most important priority to address, relating to health system organization and different  
5 leadership models. According to Lapão and colleagues (2017), the development of a healthcare  
6 organization is directly proportional to the leadership process, the professional's management  
7 ability, the incentives and the resources available[14]. The term “leadership” is now a clearer  
8 concept; however, its operationalization is still not mature and this may explain some of the  
9 difficulties acknowledged by health organizations[15]. The highest ranked subcomponent  
10 (‘overall organizational leadership in chronic illness care’) is linked with the fourth ranked  
11 priority ‘improvement strategy for chronic illness care’. ‘Improvement strategy for chronic  
12 illness care’ addresses the need for the healthcare system reorganization to face the growing  
13 problem of chronic diseases. The development of the CCM advocates organizational changes in  
14 health delivery to a patient-centered model where the patient has a proactive role managing their  
15 own disease. In the patient-centered model, all the providers are able to see patient information  
16 in their workstations and agree to follow the same guidelines and treatments with patient  
17 agreement[1]. This example integrates four of the six elements of the CCM (delivery system  
18 design, clinical information system, decision support, and self-management). ‘Continuity of care’  
19 was ranked as the second most important priority and it shows the perception of the experts for  
20 the need to change the delivery system design. In the Abu Dhabi health system, a patient is not  
21 allocated to a specific family medicine physician; the family medicine physician working at the  
22 chronic care clinics often does not follow the same patient every time causing a lack of  
23 continuity of care from the perspective of the doctor-patient relationship. ‘Effective behavior  
24 change interventions and peer support’ was also ranked as the second most important priority. In  
25 the United Kingdom, Spain and Portugal, there is a general practitioner, or family medicine  
26 doctor, attributed to each person according to the residency area who acts as the first line of  
27 contact (or the ‘gatekeeper’) between the patient and the health system[16–18]. This allows the  
28 doctor to know their patient’s history (and families), establish a relationship with them, and to  
29 promote behavior changes that are in the base of chronic disease prevention [17]. ‘Evidence-  
30 based guidelines’ was considered the third most important priority to improve the care of chronic  
31 diseases in Abu Dhabi; however, the UAE was a pioneer using evidence-based medicine, the  
32 concept was introduced in 1998[19]. One of the reasons for this subcomponent to be ranked as a  
33 priority might be the multinational origin of the healthcare workforce, who tend to follow the  
34  
35  
36  
37  
38  
39  
40  
41  
42  
43  
44  
45  
46  
47  
48  
49  
50  
51  
52  
53  
54  
55  
56  
57  
58  
59  
60

1  
2  
3 guidelines of the country where they are from and/or trained. For example, physicians from  
4 North America may follow the North American guidelines related to a specific chronic disease.  
5  
6 'Evidence-based guidelines' is also related to electronic health records and decision-support  
7 systems that might help health professionals improve their performance, in terms of better  
8 decisions and time management.  
9  
10

11  
12 'Patient compliance' was identified by the participants as the most important barrier. A study  
13 conducted in the Netherlands (2012) with the aim of understanding the development and  
14 coordination of disease management programs, also reported that patient involvement in their  
15 own care as a barrier to implementing the CCM[20]. From the literature, it is known that one  
16 way to address patient compliance is through patient education and participation[21,22]. A 'lack  
17 of standardized processes/procedures' was considered to be the second most relevant barrier and  
18 there is a need to integrate the delivery of care with the clinical systems for all professionals  
19 working in the health system. Also, this barrier seems to be related to the third ranked barrier:  
20 'differences between insurances'. Although health insurance is mandatory in the emirate of Abu  
21 Dhabi, there are different insurance packages depending on the type of employment, monthly  
22 income, and residence visa. These different insurance packages provide access to different  
23 coverage plans and services. For example, diabetes education or lactation consultations are not  
24 available for patients with the lower health insurance plan, which makes the delivery of care not  
25 standardized for the healthcare workers, as they are not able to provide the same procedure to all  
26 patients. The 'differences between insurances' was also considered a barrier by Haggstrom and  
27 colleagues (2012) when they assessed the CCM implementation for cancer screening in  
28 community centers in the United States of America[23]. The 'lack of regional plans  
29 standardizing the guidelines between the facilities' was considered to be the fourth barrier. Abu  
30 Dhabi's publicly funded health system seems to have a centralized organizational model where  
31 further work inside the organization to engage top managers, and healthcare workers is needed to  
32 understand why the same level of care following the same directions is not provided in all  
33 facilities. The barrier ranked as the fifth most important barrier was a 'lack of monitoring'. This  
34 barrier is linked to the 'lack of standardized processes/procedures' and shows that the healthcare  
35 workers and clinical directors feel the need for monitoring and feedback on their performance,  
36 interventions or implemented measures. These findings suggests that there is the need to examine  
37 the effectiveness and efficiency of the different communication channels, both horizontally and  
38  
39  
40  
41  
42  
43  
44  
45  
46  
47  
48  
49  
50  
51  
52  
53  
54  
55  
56  
57  
58  
59  
60

1  
2  
3 vertically, within an organization. Hroszkowski and colleagues (2006) in the United States of  
4 America, reported barriers related to the ‘lack of monitoring’ when they implemented the CCM  
5 in a group of 18 clinics: insufficient time to measure the change, lack of measures to assess  
6 change, and a lack of specific details and desired care changes[24]. It is hoped that our findings  
7 on the priorities and barriers of the CCM implementation in the Abu Dhabi health system will  
8 contribute to the continuous improvement of the quality of healthcare delivery both for the  
9 patient and healthcare workers. The UAE can serve as an example for other high income and/or  
10 rapidly developing countries. The leadership stability, the availability and proper allocation of  
11 the resources, and the long-term economic and social strategies allowed the implementation of  
12 successful healthcare strategies creating an international competitive health system. To improve  
13 the delivery of care to chronic patients in the emirate of Abu Dhabi the development of a  
14 healthcare strategy to achieve the UAE Vision 2021 is recommended. Based on the modified  
15 Delphi and the CCM premises it would be recommended that a strategy includes:  
16  
17  
18  
19  
20  
21  
22  
23  
24  
25

- 26 • ongoing training for middle and executive managers on standardized leadership and  
27 communication skills;
- 28 • designing an appropriate improvement strategy for each healthcare service center with  
29 the patient at the center of the care;
- 30 • implementing a general practitioner/family medicine physician model in healthcare  
31 centers in Abu Dhabi;
- 32 • ensuring the use of the evidence-based guidelines;
- 33 • increasing the number of health educators to provide all patients with self-management  
34 support sessions to help them understand their proactive role managing their own disease  
35 (“how to comply”);
- 36 • healthcare facilities for types of insurances ensuring that healthcare workers can provide  
37 the highest level of standardized and quality care regardless of the patient’s health  
38 insurance (this already happens in some cases);
- 39 • establishing a monitoring process for healthcare workers with integrated feedback linked  
40 to team and facilities objectives (it is already used in some facilities Abu Dhabi).

41  
42  
43  
44  
45  
46  
47  
48  
49  
50  
51  
52  
53  
54 It is believed that these strategies can be applied to other health systems facing the same  
55 challenges of an ageing population coupled with high levels of lifestyle-related chronic diseases.  
56  
57

1  
2  
3 Our findings also highlight some important concepts (continuity of care, differences between  
4 insurances) required to globally achieve universal health coverage.  
5  
6

7 **Strengths:** The wireless computer-linked keypads ensured participant privacy and  
8 confidentiality during the modified Delphi technique and this should have minimized response  
9 bias. In addition, completing the study over three consecutive days, as opposed to weeks and  
10 months required with a postal or email methodology, resulted in a 95% response rate and a low  
11 attrition rate. Overall, our methodology using wireless handheld keypads enabled a rapid  
12 consensus process to effectively identify priorities and barriers for the CCM in Abu Dhabi's  
13 health system. There are at least three previous studies that have used a Delphi technique in the  
14 UAE to reach consensus on occupational health [25], elderly care [26], and medical  
15 professionalism [26–28]; however, our study is the first to use a modified Delphi technique to  
16 elucidate the priorities and barriers of the CCM in Abu Dhabi's healthcare system.  
17  
18  
19  
20  
21  
22  
23  
24

25 **Limitations:** One of the limitations of this modified Delphi technique is the requirement for the  
26 participants to be physically present, which can introduce a selection bias if the attendance  
27 reduces significantly during the rounds[28]. However, the response rate in this study was 95%,  
28 as from day one to the end of the study only one participant was absent, round 2 and 3 had 19  
29 participants instead of 20. Our study specifically recruited expert frontline health care workers  
30 that delivered daily care to patients with chronic diseases. As such, the sample did not contain  
31 any executive healthcare leaders or policy makers and future studies may want to consider  
32 conducting a Delphi study focusing on this group. Another limitation is the inability to  
33 generalize our results to the health systems operating in other emirates in the UAE; however, this  
34 was not the purpose of this study.  
35  
36  
37  
38  
39  
40  
41  
42  
43

#### 44 **Adequacy of conclusions**

45 The modified Delphi technique achieved the aim of identifying the priorities and barriers of the  
46 CCM in Abu Dhabi's healthcare system; specifically, 'Overall Organizational Leadership in  
47 Chronic Illness Care' was ranked as the top priority and 'Patient Compliance' as the most  
48 important barrier. This study represents an important step in the process of understanding the key  
49 barriers and priority areas for interventions to maximize the development of the CCM in the  
50 health system of Abu Dhabi emirate in the UAE.  
51  
52  
53  
54  
55  
56  
57  
58  
59  
60

**Funding** This research received no specific grant from any funding agency in the public, commercial or not-for-profit sectors.

**Competing interests** The authors do not declare any competing interests.

**Acknowledgments** The authors would like to thank the twenty health systems experts that participated in our study.

**Contributors.** MSP, TL and LVL designed the study. MSP and TL collected the data. MSP analyzed the data and wrote the first draft of the manuscript. TL and LVL gave significant intellectual contributions for the final draft.

**Reporting guidelines** Conducting and REporting DELphi Studies – CREDES.

**Data sharing** No additional data available.

## REFERENCES

- 1 Coleman K, Austin BT, Brach C, *et al.* Evidence on the Chronic Care Model in the new millennium. *Health Aff* 2009;**28**:75–85. doi:10.1377/hlthaff.28.1.75
- 2 Wagner EH, Austin BT, Davis C, *et al.* Improving chronic illness care: Translating evidence into action. *Health Aff* 2001;**20**:64–78. doi:10.1377/hlthaff.20.6.64
- 3 Hung DY, Rundall TG, Tallia AF, *et al.* Rethinking prevention in primary care: applying the chronic care model to address health risk behaviors. *Milbank Q* 2007;**85**:69–91. doi:10.1111/j.1468-0009.2007.00477.x
- 4 Asch SM, Baker DW, Keesey JW, *et al.* Does the collaborative model improve care for chronic heart failure? *Med Care* 2005;**43**:667–75. doi:10.1097/01.mlr.0000167182.72251.a1
- 5 Renders CM, Valk GD, Griffin SJ, *et al.* Interventions to improve the management of diabetes in primary care, outpatient, and community settings: A systematic review. *Diabetes Care* 2001;**24**:1821–33. doi:10.2337/diacare.24.10.1821
- 6 Paulo MS, Loney T, Lapão LV. The primary health care in the emirate of Abu Dhabi: are they aligned with the chronic care model elements? *BMC Health Serv Res* 2017;**17**:725.

- 1  
2  
3 doi:10.1186/s12913-017-2691-4  
4  
5  
6 7 Koornneef E, Robben P, Blair I. Progress and outcomes of health systems reform in the  
7 United Arab Emirates: a systematic review. *BMC Health Serv Res* 2017;**17**:672.  
8 doi:10.1186/s12913-017-2597-1  
9  
10  
11 8 Health Authority Abu Dhabi. Health Statistics 2016. Abu Dhabi: 2017.  
12  
13  
14 9 Prime Minister's Office. World-Class Healthcare | UAE Vision 2021.  
15 2016.<https://www.vision2021.ae/en/national-priority-areas/world-class-healthcare>  
16 (accessed 8 Jan 2018).  
17  
18  
19  
20 10 Weinstein BD. What is an expert? *Theor Med* 1993;**14**:57–  
21 73.<http://www.ncbi.nlm.nih.gov/pubmed/8506540> (accessed 8 Jan 2018).  
22  
23  
24 11 Hsu C-C, Sandford B. The Delphi technique. *Prat Assess Res Eval* 2007;**12**:273–300.  
25 doi:10.1080/02688867.1988.9726654  
26  
27  
28  
29 12 Lalloo D, Demou E, Kiran S, *et al*. Core competencies for UK occupational health nurses:  
30 a Delphi study. *Occup Med Public Heal Nurs (Occupational Heal* 2016;**66**:649–55.  
31 doi:10.1093/occmed/kqw089  
32  
33  
34  
35 13 Jünger S, Payne SA, Brine J, *et al*. Guidance on Conducting and Reporting Delphi Studies  
36 (CREDES) in palliative care: Recommendations based on a methodological systematic  
37 review. *Palliat Med* 2017;:26921631769068. doi:10.1177/0269216317690685  
38  
39  
40  
41 14 Lapão LV, Arcêncio RA, Popolin MP, *et al*. Atenção Primária à Saúde na coordenação  
42 das Redes de Atenção à Saúde no Rio de Janeiro, Brasil, e na região de Lisboa, Portugal.  
43 *Cien Saude Colet* 2017;**22**:713–24. doi:10.1590/1413-81232017223.33532016  
44  
45  
46  
47 15 Lapão L, Dussault G. PACES: a national leadership program in support of primary-care  
48 reform in Portugal. *Leadersh Heal Serv* 2011;**21**:295–307.  
49 doi:10.1108/17511871111172349  
50  
51  
52  
53 16 Onion DK, Berrington RM. Comparisons of UK General Practice and US Family Practice.  
54 *J MAmerican Board Fam Med* 1999;**12**.<http://www.jabfm.org/content/12/2/162.full.pdf>  
55  
56  
57  
58  
59  
60



- (accessed 10 Apr 2017).
- 17 Santos I, Qualidade I De, Desempenho I De, *et al.* Indicadores de desempenho na consulta. *Rev Port Med Geral e Fam* 2009;:227–35.
- 18 Silva Miguel L, Brito de Sa A. *Cuidados de Saúde Primários em 2011-2016: reforçar, expandir Contribuição para o Plano Nacional de Saúde 2011-2016*. Lisboa: : Alto Comissariado do Ministerio da Saude 2010. <http://1nj5ms2lli5hdggbe3mm7ms5.wpengine.netdna-cdn.com/files/2010/08/CSP1.pdf> (accessed 10 Apr 2017).
- 19 Al-Almaie SM, Al-Baghli NA. Evidence based medicine: an overview. *J Family Community Med* 2003;10:17–24.<http://www.ncbi.nlm.nih.gov/pubmed/23011987> (accessed 12 Apr 2017).
- 20 Kadu MK, Stolee P. Facilitators and barriers of implementing the chronic care model in primary care: a systematic review. *BMC Fam Pr* 2015;16:12. doi:10.1186/s12875-014-0219-0
- 21 Atreja A, Bellam N, Levy SR. Strategies to enhance patient adherence: making it simple. *MedGenMed* 2005;7:4.<http://www.ncbi.nlm.nih.gov/pubmed/16369309> (accessed 10 Apr 2017).
- 22 Gold DT, McClung B. Approaches to Patient Education: Emphasizing the Long-Term Value of Compliance and Persistence. *Am J Med* 2006;119:S32–7. doi:10.1016/j.amjmed.2005.12.021
- 23 Haggstrom DA, Taplin SH, Monahan P, *et al.* Chronic Care Model implementation for cancer screening and follow-up in community health centers. *J Health Care Poor Underserved* 2012;23:49–66. doi:10.1353/hpu.2012.0131
- 24 Solberg LI, Crain AL, Sperl-hillen JM, *et al.* Care Quality and Implementation of the Chronic Care Model: A Quantitative Study. 2006;:310–6. doi:10.1370/afm.571.INTRODUCTION
- 25 Lalloo D, Demou E, Kiran S, *et al.* International perspective on common core

- 1  
2  
3 competencies for occupational physicians: a modified Delphi study. *Occup Environ Med*  
4 2016;:1–7. doi:10.1136/oemed-2015-103285  
5  
6  
7  
8 26 Al Shemeili S, Klein S, Strath A, *et al.* A modified Delphi study of structures and  
9 processes related to medicines management for elderly hospitalised patients in the United  
10 Arab Emirates. *J Eval Clin Pract* 2016;**22**:781–91. doi:10.1111/jep.12542  
11  
12  
13 27 Abdel-Razig S, Ibrahim H, Alameri H, *et al.* Creating a Framework for Medical  
14 Professionalism: An Initial Consensus Statement From an Arab Nation. *J Grad Med Educ*  
15 2016;**8**:165–72. doi:10.4300/JGME-D-15-00310.1  
16  
17  
18  
19 28 Aw T-C, Loney T, Elias A, *et al.* Use of an audience response system to maximise  
20 response rates and expedite a modified Delphi process for consensus on occupational  
21 health. *J Occup Med Toxicol* 2016;**11**:9. doi:10.1186/s12995-016-0098-5  
22  
23  
24  
25  
26  
27

## 28 FIGURES

29 **Figure 1:** Delphi technique rounds procedure.  
30  
31  
32  
33  
34  
35  
36  
37  
38  
39  
40  
41  
42  
43  
44  
45  
46  
47  
48  
49  
50  
51  
52  
53  
54  
55  
56  
57  
58  
59  
60

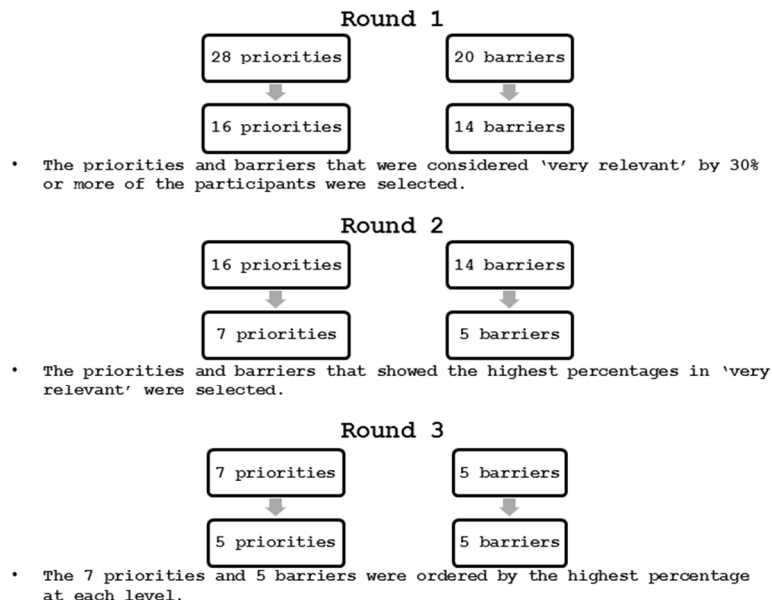

28  
29  
30  
31  
32

Delphi technique rounds procedure.

33  
34  
35  
36  
37  
38  
39  
40  
41  
42  
43  
44  
45  
46  
47  
48  
49  
50  
51  
52  
53  
54  
55  
56  
57  
58  
59  
60

81x60mm (300 x 300 DPI)

**Box 3. Recommendations for the Conducting and Reporting of Delphi Studies (CREDES)[1].**

## Rationale for the choice of the Delphi technique

1. *Justification.* The choice of the Delphi technique as a method of systematically collating expert consultation and building consensus needs to be well justified. When selecting the method to answer a particular research question, it is important to keep in mind its constructivist nature

## Planning and design

2. *Planning and process.* The Delphi technique is a flexible method and can be adjusted to the respective research aims and purposes. Any modifications should be justified by a rationale and be applied systematically and rigorously
3. *Definition of consensus.* Unless not reasonable due to the explorative nature of the study, an a priori criterion for consensus should be defined. This includes a clear and transparent guide for action on (a) how to proceed with certain items or topics in the next survey round, (b) the required threshold to terminate the Delphi process and (c) procedures to be followed when consensus is (not) reached after one or more iterations

## Study conduct

4. *Informational input.* All material provided to the expert panel at the outset of the project and throughout the Delphi process should be carefully reviewed and piloted in advance in order to examine the effect on experts' judgements and to prevent bias
5. *Prevention of bias.* Researchers need to take measures to avoid directly or indirectly influencing the experts' judgements. If one or more members of the research team have a conflict of interest, entrusting an independent researcher with the main coordination of the Delphi study is advisable
6. *Interpretation and processing of results.* Consensus does not necessarily imply the 'correct' answer or judgement; (non)consensus and stable disagreement provide informative insights and highlight differences in perspectives concerning the topic in question
7. *External validation.* It is recommended to have the final draft of the resulting guidance on best practice in palliative care reviewed and approved by an external board or authority before publication and dissemination

## Reporting

8. *Purpose and rationale.* The purpose of the study should be clearly defined and demonstrate the appropriateness of the use of the Delphi technique as a method to achieve the research aim. A rationale for the choice of the Delphi technique as the most suitable method needs to be provided. **Page 5**
9. *Expert panel.* Criteria for the selection of experts and transparent information on recruitment of the expert panel, socio-demographic details including information on expertise regarding the topic in question, (non)response and response rates over the ongoing iterations should be reported **Page 5**
10. *Description of the methods.* The methods employed need to be comprehensible; this includes information on preparatory steps (How was available evidence on the topic in question synthesised?), piloting of material and survey instruments, design of the survey instrument(s), the number and design of survey rounds, methods of data analysis, processing and synthesis of experts' responses to inform the subsequent survey round and methodological decisions taken by the research team throughout the process **Page 6**
11. *Procedure.* Flow chart to illustrate the stages of the Delphi process, including a preparatory phase, the actual 'Delphi rounds', interim steps of data processing and analysis, and concluding steps **Page 6**
12. *Definition and attainment of consensus.* It needs to be comprehensible to the reader how consensus was achieved throughout the process, including strategies to deal with non-consensus **Page 6**
13. *Results.* Reporting of results for each round separately is highly advisable in order to make the evolving of consensus over the rounds transparent. This includes figures showing the average group response, changes between rounds, as well as any modifications of the survey instrument such as deletion, addition or modification of survey items based on previous rounds **Page 7**
14. *Discussion of limitations.* Reporting should include a critical reflection of potential limitations and their impact of the resulting guidance **Page 8/11**
15. *Adequacy of conclusions.* The conclusions should adequately reflect the outcomes of the Delphi study with a view to the scope and applicability of the resulting practice guidance **Page 12**
16. *Publication and dissemination.* The resulting guidance on good practice in palliative care should be clearly identifiable from the publication, including recommendations for transfer into practice and implementation. If the publication does not allow for a detailed presentation of either the resulting practice guidance or the methodological features of the applied Delphi technique, or both, reference to a more detailed presentation elsewhere should be made (e.g. availability of the full guideline from the authors or online; publication of a separate paper reporting on methodological details and particularities of the process (e.g. persistent disagreement and controversy on certain issues)). A dissemination plan should include endorsement of the guidance by professional associations and health care authorities to facilitate implementation

\*Consolidated criteria for reporting qualitative research

\*\*Consolidated Standards of Reporting Trials

1  
2  
3  
4  
5  
6  
7  
8  
9  
10  
11  
12  
13  
14  
15  
16  
17  
18  
19  
20  
21  
22  
23  
24  
25  
26  
27  
28  
29  
30  
31  
32  
33  
34  
35  
36  
37  
38  
39  
40  
41  
42  
43  
44  
45  
46  
47  
48  
49  
50  
51  
52  
53  
54  
55  
56  
57  
58  
59  
60

[1] Jünger S, Payne SA, Brine J, *et al.* Guidance on Conducting and Reporting Delphi Studies (CREDES) in palliative care: Recommendations based on a methodological systematic review. *Palliat Med* 2017;:26921631769068. doi:10.1177/0269216317690685

For peer review only
